# Supplementary material for: A comparison of a GPS device and a multi-camera video technology during official soccer matches: Agreement between systems
Source: PLoS One. 2019 Aug 8;14(8):e0220729. doi: 10.1371/journal.pone.0220729 (PMC6687125; doi:10.1371/journal.pone.0220729)
Supplement: S1 File — (XLS) [file pone.0220729.s001.xls]

## Sheet: Hoja1
DISTANCE		DISTANCE/M		AVE SPEED		SPEED MAX		WALKING		JOGGING		RUNNING		INTENSE RUNNING		SPRINT LOW		SPRINT HIGH
WIMU	MEDIACOACH	WIMU	MEDIACOACH	WIMU	MEDIACOACH	WIMU	MEDIACOACH	WIMU	MEDIACOACH	WIMU	MEDIACOACH	WIMU	MEDIACOACH	WIMU	MEDIACOACH	WIMU	MEDIACOACH	WIMU	MEDIACOACH
260.59	241.74	152.85	141.7	9.05	8.62	27.4	24.88	49.08	42.45	69.31	61.16	119.93	128.26	15.28	15	2.52	2.86	4.46	3.2
6374.19	6085.83	135.69	129.55	7.83	7.86	30.17	29.66	1472.23	1213.68	2834.81	2627.63	1386.34	1457.69	386.29	426.68	180.09	240.4	114.44	119.74
2936.51	2765.25	62.84	59.17	3.67	3.58	20.74	21.31	2342.2	2091.85	512.72	546.82	67.02	112.76	14.57	11.46	2	2.36	81.24	80.46
4926.51	4834.63	105.42	103.45	6.58	6.24	31.5	31.64	1603.9	1466.08	1939.23	1887.34	1079.23	1167.52	180.02	188.51	42.88	44.71	118.33	120.25
5687.89	5601.91	125.94	124.03	7.55	7.51	29.52	30.71	1659.2	1517.46	2075.61	2016.59	1258.64	1355.13	400.48	367.68	175.63	224.8	123.83	119.29
5486.97	5407.38	121.68	119.91	7.31	7.22	31.7	31.32	1634.39	1470.41	1775.96	1651.76	1543.79	1678.34	308.17	365.73	100.84	121.83	150.7	232.51
5044.89	4972.11	111.87	110.26	6.49	6.69	33.06	32.62	1820.4	1442.57	1693.91	1731.4	1056.06	1169.26	181.89	205.82	141.92	190.55	131.86	144.82
2476.14	2425.13	54.97	53.84	3.61	3.27	16.3	17.6	1932.98	1877.71	481.45	468.12	61.71	79.29	17.27	14.1	0.1	0.1	100.77	120.3
2589.17	2548.56	55	54.13	3.75	3.35	22.36	20.63	1902.5	1845.88	564.61	567.3	104.15	121.28	201.16	202.25	0.64	0.1	83.1	85.04
5077.13	5040.92	112.42	111.61	6.63	6.73	32.89	32.62	1738.13	1556.67	1921.5	1887.11	977.52	1133.13	230.14	249.5	106.96	116.93	42.41	45.34
5294.69	5264.83	117.41	116.75	7.17	7.02	33.21	30.74	1488.33	1404.97	1972.11	1907.11	1386.61	1448.41	404.47	473.09	116.73	134.55	51.8	56.12
6373.85	6346.76	138.13	137.54	8.48	8.3	30.45	28.69	1173.31	1121.78	2638.91	2546.54	1863.35	1915.22	8.84	12.58	210.7	205.1	149.75	186.3
2545.31	2523.98	56.47	55.99	3.66	3.38	21.19	21.53	2058.21	2025.48	432.02	429.6	45.04	53	28.06	28.68	1.2	3.31	24.14	29.59
2949.63	2933.65	65.51	65.15	4.12	3.93	24.49	23.83	2202.54	2169.92	559.89	550.76	141.03	156.04	11.22	25.41	17.35	28.25	1.44	3.26
2502.77	2486.88	53.77	53.43	3.66	3.27	22.17	21.06	1973.61	1939.16	409.46	416.87	106.66	104.5	263.04	296.22	1.82	0.94	46.76	58.96
5423.68	5412.05	122.05	121.78	7.47	7.57	26.99	26.68	1449.6	1283.94	2050.19	1980.82	1515.68	1685.01	225.73	237.19	102.76	120.72	86.29	116.1
5458.03	5452.78	115.94	115.82	7.48	7.16	26.96	27.79	1284.69	1272.38	2388.83	2358.14	1408.19	1408.9	11.9	7.02	98.79	120.04	84.98	90.13
2415.17	2411.43	53.43	53.34	3.73	3.27	23.24	23.08	1793.77	1762.36	495.87	503.35	97.63	116.73	2.14	6.33	15.99	21.97	34.84	46.62
2624.77	2622.92	58.29	58.24	3.91	3.55	20.33	21.2	1920.94	1898.1	619.14	611.12	82.55	105.95	11.63	13.8	1	1.41	6.38	11.57
2827.91	2826.72	60.15	60.12	3.88	3.64	21.36	21.64	2106.87	2073.48	623.86	626.33	84.34	108.13	4.72	12.81	1.21	4.99	103.29	103.96
2618.87	2618.23	57.21	57.19	3.85	3.48	19.53	19.76	1975.99	1964.28	512.77	498.46	125.38	142.67	6.57	11.67	1	1	109.07	115.77
2612	2613.02	55.6	55.62	3.76	3.41	22.71	23.54	1951.21	1929.65	569.15	565.83	75.82	93.91	1.03	6	9.25	11.96	214.54	242.03
2618.56	2620	56.92	56.95	3.78	3.44	18.04	19.26	2057.12	2023.99	465.29	477.62	95.1	112.39	2.66	2.47	2	2	155.93	192.48
2864.98	2867.6	62.38	62.43	3.96	3.75	18.97	18.83	2178.88	2151.12	626.4	629.99	57.03	84.01	253.37	255.06	2	2	45.85	49.56
4826.11	4836.26	107.02	107.24	6.52	6.46	33.32	32.36	1785.81	1689.51	1583.3	1552.4	897.72	980.83	358.7	370.06	156.17	172.16	111.32	127.48
5573.96	5584.88	121.36	121.6	7.67	7.37	26.7	27.04	1286.92	1276.47	2099.85	2093.93	1691.93	1693.44	6.43	3.06	112.42	121.39	143.43	236.48
2619.71	2630.83	56.3	56.54	3.74	3.43	24.69	24.7	2049.15	2045.97	503.96	508.63	54.28	65.38	386.64	416.06	4.45	4.54	154.27	172.48
6015.65	6028.1	130.74	131.01	8.07	7.88	26.71	26.28	1337.87	1260.29	2209.12	2227.55	1876.85	1913.25	10.01	28.02	158.42	151.98	110.82	119.62
2490.99	2503.85	55.25	55.53	3.75	3.4	20.14	20.16	1887.37	1835.13	450.44	487.89	143.17	152.8	7.97	14.91	1	1	174.6	193.08
2706.17	2720.61	58.65	58.96	3.84	3.58	19.83	19.84	2085.67	2059.89	508.71	518.25	103.82	127.56	9.16	7.65	1	1	341.16	399.99
2460.54	2475.34	54.09	54.41	3.67	3.32	20.46	21.96	1911.77	1905.68	432.05	437.71	107.56	122.59	8.03	8.23	1	1.7	21.63	32.96
2156.27	2172.81	46.82	47.17	3.52	2.97	20.76	20.3	1713.32	1708.2	383.21	390.75	51.7	65.63	313.6	376.07	1	1	69.88	79.25
5829.93	5845.9	129.48	129.83	7.93	7.83	27.92	27.9	1245.92	1144.99	2598.28	2578.24	1402.58	1446.16	202.46	220.7	183.25	184.34	123.37	129.3
5186.9	5204.96	114.75	115.14	7.05	6.91	30.78	30.1	1442.37	1372.88	2033.72	2040.3	1329.25	1393.18	8.28	9.45	94.12	87.77	108.62	123.77
2623.18	2641.95	58.19	58.6	3.77	3.56	19.76	21.31	1948.98	1876.04	552.84	585.45	113.08	169.6	386.12	399.22	1.1	1.42	63.59	67.04
5848.04	5867.11	129.68	130.1	8.11	7.82	26.21	27.07	1202.06	1171.5	2336.29	2288.85	1690.03	1735.55	11.6	6.74	198.7	225.37	129.21	141.69
2774.79	2794.17	60.25	60.67	4.05	3.69	25.86	25.96	1943.53	1944.66	666.82	657.61	133.82	160.81	271.85	328.23	12.64	12.76	202.85	200.19
5607.25	5628.24	124.53	124.99	7.63	7.54	28.84	28.15	1300.06	1166.36	2275.22	2279.41	1515.18	1604.92	423.74	436.73	141.64	145.36	84.44	88.82
6077.85	6100.66	132.33	132.83	8.33	8.02	28.52	28.26	1130.77	1105.03	2370.49	2328.67	1832.82	1887.65	271.47	285.46	210.95	226.81	105.64	119.76
4960.52	4985.65	105.37	105.9	6.64	6.51	32.09	32.76	1659.95	1593.79	1710.2	1728.44	971.24	995.75	261.82	277.59	133.12	140.2	253.08	273.4
5446.72	5473.23	115.95	116.51	7.18	7.1	30.56	29.38	1583.92	1486.25	2040.13	2021.37	1240.14	1313.14	366.81	401.58	164.78	182.39	206.75	208.44
5526.24	5553.63	122.55	123.15	7.62	7.42	28.62	27.76	1317.43	1274.16	2030.08	1964.6	1595.46	1683.55	360.81	383.72	170.61	180.17	123.65	132.56
5757.02	5787.31	124.99	125.65	7.73	7.57	29.34	28.84	1562.97	1569.87	2137.68	2098.65	1401.99	1404.72	222.33	319.67	182.24	202.85	94.96	99.88
5348.47	5381.49	116.29	117	6.76	7.08	32.8	32.26	1820.65	1349.43	1862.5	1844.68	1148.12	1433.94	209.93	206.12	151.44	197.28	50.05	49.42
5205.34	5239.35	113.15	113.88	6.93	6.84	31.81	31.43	1660.72	1638.87	1879.78	1863.23	1165.45	1198.59	416.14	436.48	135.19	160.06	51.34	58.09
5600.1	5634.69	121.93	122.68	7.62	7.45	30.16	28.37	1543.97	1548.18	1717.46	1652.46	1631.29	1686.88	284.24	318.4	180.42	191.07	106.91	134.64
5418.75	5452.82	120.34	121.1	7.47	7.31	30.68	31.39	1362.99	1297.3	2270.14	2231.71	1147.77	1222.66	205.11	227.37	179.03	189.68	140.59	150.29
4674.35	4709.82	100.02	100.78	6.4	6.15	32.25	32.94	1789.73	1733.4	1475.8	1446.76	631.63	691.01	239.09	264.69	230.92	211.29	140.95	162.48
5674.63	5710.15	126.08	126.87	7.67	7.64	28.15	27.76	1368.09	1328.51	2344.45	2225	1614.54	1769.23	475.5	530.86	86.83	89.77	1.36	1.12
6600.82	6639.39	143.46	144.29	8.76	8.67	27.62	27.36	1131.4	1092.65	2697.13	2669.66	1987.28	2002.37	311.14	342.81	239.62	264.61	238.29	250.55
5352.48	5391.61	113.85	114.68	7.13	6.93	30.3	28.51	1880.9	1881.49	1585.78	1540.5	1277.42	1319.76	280.72	328.42	173.87	177.76	53.59	62.5
5019.76	5059.91	107.41	108.27	6.69	6.57	31.24	30.89	1668.75	1586.18	1571.32	1510.97	1258.31	1365.71	246.74	290.26	132.04	144.86	25.45	21.66
5940.64	5981.57	126.36	127.22	7.84	7.67	29.06	27.72	1289.65	1250.41	2576.07	2539.65	1614.6	1671.03	403.29	417.63	149.98	163.17	37.4	49.68
5860.82	5901.13	127.61	128.48	7.98	7.88	30.2	29.45	1353.28	1317.02	2078.34	2015.98	1725.19	1811.12	265.9	273.88	171.52	197.69	107.46	122.65
5130.58	5171.71	111.5	112.39	6.88	6.79	30.98	29.92	1719.62	1643.38	1734.73	1707.73	1039.57	1134.69	456.23	476.35	167.91	211.84	45.33	95.75
5704.94	5748.28	121.31	122.22	7.61	7.42	27.33	27	1488.38	1498.33	1913.58	1851.97	1598.02	1670.06	178.66	179.09	164.29	162.76	6.44	17.46
5051.15	5094.16	108.56	109.48	6.82	6.71	33.82	33.08	1597.25	1542.48	1935.03	1926.07	1142.64	1233.53	307.24	379.36	91.94	93.22	62.43	73.79
5622.34	5664.57	124.82	125.75	7.52	7.57	33.77	32.22	1560.15	1429.6	1925.92	1919.79	1359.89	1437.14	264.75	292.09	216.06	225.28	67.67	59.55
5482.14	5525.3	118.8	119.74	7.34	7.24	33.72	31.79	1559.49	1512.39	2028.85	1992.31	1207.14	1304.2	297.82	386.82	215.16	215.88	176.25	178.5
5262.12	5306.39	112.6	113.54	6.8	6.82	30.9	31.39	1772.74	1571.07	1602.6	1581.58	1349.41	1484.37	241.17	253.82	115.91	149.99	33.03	41.33
4933.78	4978.21	106.89	107.85	6.59	6.49	31.39	31.1	1692.44	1677.17	1766.37	1758.56	1031.61	1056.95	367.4	381.16	107.23	131.83	19.42	15.25
5786.11	5830.7	125.68	126.64	7.67	7.7	28.18	26.68	1448.43	1377.78	2015.02	1969.49	1743.65	1864.14	237.07	258.23	161.56	188.71	62.73	71.06
4966.45	5011.99	107.94	108.92	6.7	6.55	29.72	30.02	1452.84	1404.59	2148.04	2178.44	1002.29	1032.37	311.11	367.78	74.87	80.27	25.22	42.75
5782.98	5828.4	128.27	129.27	7.85	7.8	30.48	30.71	1459.31	1409.64	2028.62	1979.96	1703.61	1771.94	382.1	443	173.42	164.45	53.57	60.59
5450.72	5497.04	118.12	119.12	7.41	7.25	32.52	31.68	1596.99	1570.94	1592.01	1524.31	1555.62	1610.29	250.23	294.27	183.41	198.2	41.23	60.94
5521.24	5568.03	117.53	118.53	7.43	7.24	29.69	28.37	1365.9	1329.88	2212.78	2159.3	1440.93	1527.04	9.18	10.15	110.46	95.07	159.54	172.99
2632.86	2679.57	57.19	58.2	3.73	3.52	24.12	25.45	2039.78	2043.45	480.56	507.93	96.29	109.9	318.99	389.9	5.69	7.01	122.84	126.24
5434.48	5482.59	117.99	119.03	7.51	7.3	34.71	30.38	1518.61	1479.25	1909.71	1873.43	1271.81	1305.23	333.39	360.95	177.07	184.24	65.8	75.06
5862.23	5911.3	124.52	125.56	7.85	7.6	30.54	29.77	1341.16	1295.7	2270.54	2266.11	1697.38	1742.86	295.13	337.62	166.18	183.18	51.68	55.51
5401.24	5449.5	117.43	118.48	7.5	7.14	26.26	25.96	1244.84	1208.11	2117.2	2024.48	1612.77	1737.38	325.69	313.29	105.86	120.24	49.24	51.53
5741.95	5791.85	124.43	125.51	7.77	7.58	27	26.75	1360.53	1307.18	2184.69	2143.62	1690.36	1814.79	514.57	531.58	143.27	163.3	105.03	132.28
6014.8	6063.58	133.53	134.61	8.14	8.1	26.95	26.93	1326.35	1277.51	2103.67	2090.48	1715.49	1760.42	400.57	488.3	247.27	280.95	72.61	84.16
5936.53	5987.85	128.94	130.05	8.07	7.91	26.99	29.34	1311.99	1215.91	2252.72	2167.73	1742.33	1791.51	203.81	233.83	183.58	228.64	62.2	66.68
4982.39	5035.84	105.83	106.96	6.62	6.52	26.45	26.39	1416.46	1377.27	2123.85	2107.6	1175.57	1243.16	228.38	230	56.25	56.52	106.97	137.28
2740.3	2764.97	127.15	128.29	8.21	8.17	27.27	28.4	652	649.41	1007.05	979.61	653.93	680.89	172.66	188.1	136.51	151.27	187.08	188.9
5326.05	5378.3	117.83	118.98	7.29	7.19	29.03	29.27	1372.89	1312.96	2452.47	2435.9	1132.36	1222.19	302.03	308.04	127.99	159.6	60.51	68.32
5154.04	5209.72	110.77	111.96	7.02	6.86	31.18	30.71	1784.73	1788.85	1684.43	1694.88	1016.14	1021.65	268.98	261.95	190.45	217.79	144.76	151.34
5472.43	5529.86	118.83	120.07	7.41	7.28	26.62	25.96	1396.54	1327.3	2030.39	1977.33	1616.48	1780.57	180.45	203.2	127.01	141.38	62.83	68.4
4798.87	4855.42	106.53	107.79	6.58	6.51	29.05	29.52	1516.26	1475.71	1854.76	1871.21	1187.73	1224.24	312.38	363.32	40.24	65.8	48.43	69.15
5548.95	5609.32	118.74	120.02	7.37	7.25	28.65	27.4	1456.82	1301.94	2000.55	1957.2	1565.36	1735.05	222.96	268.79	151.11	180.76	74.39	94.74
5628.25	5688.9	119.71	121	7.47	7.28	27.29	26.35	1454.84	1450.06	2053.39	1980.75	1741.44	1814.23	221.75	253.26	130.39	132.32	130.19	139.11
5063.08	5123.28	109.69	110.99	6.9	6.68	31.24	29.3	1731.57	1782.65	1802.07	1711.83	1130	1187.06	490.8	557.91	124.12	127.88	48.23	53.03
6135.56	6195.65	134.03	135.34	8.34	8.2	30.42	28.26	1191.47	1122.48	2492.36	2473.22	1772.06	1787.69	454.65	465.33	147.64	193.41	192.37	229.61
6055.61	6116.17	131.23	132.54	7.98	7.97	32.03	30.92	1576.19	1567.33	2116.48	2067.88	1459.01	1506.35	387.08	408.49	289.74	336.29	86.98	104.86
5828.68	5889.4	126.91	128.23	7.94	7.75	29.83	29.45	1288.83	1298.35	2258.66	2289.92	1546.27	1504.14	296.58	300.85	225.01	262.26	89.57	103.61
5509.97	5571.65	119.75	121.09	7.52	7.32	30.19	29.88	1473.53	1423.31	1835.1	1811.89	1680.94	1768.11	195	218.67	158.02	192.42	206.77	225
5324.09	5385.76	118.24	119.61	7.35	7.23	29.38	28.48	1287.76	1228.59	2338.84	2367.29	1400.64	1440.1	295.83	322.32	50.18	75.6	158.89	175.24
5143.46	5207.91	111.68	113.08	7.18	6.93	27.93	29.38	1326.3	1284.7	2047.49	2048	1288.32	1333.22	210.69	250.79	136.28	168.14	55.94	54
5206.15	5271.86	111.85	113.26	7.02	6.85	29.89	31.14	1580.51	1527.02	1913.45	1949.89	1297.59	1298.31	516.56	574.71	98.86	113.57	99.1	106.74
6139.14	6203.5	136.34	137.76	8.37	8.33	32.44	31.43	1308.73	1250.39	1892.6	1836.89	2141.71	2238.17	2.14	3.82	206.93	219.19	165.92	204.35
2606.96	2670.92	57.62	59.04	3.73	3.56	19.04	19.58	2041.8	2057.75	479.16	495.37	83.86	113.98	254.86	277.89	1	1	170.61	201.19
4874.74	4939	107.94	109.36	6.79	6.6	30.42	29.05	1793.3	1797.26	1430.27	1414.02	1176.15	1199.48	377.01	386.3	157.95	183.67	36.91	47.95
5247.78	5313.73	113.69	115.11	7.3	7.01	29.14	28.08	1628.05	1652.53	1599.32	1538.76	1301.74	1362.64	264.65	268.9	234.68	236.22	114.16	114.65
4805.93	4871.7	106.78	108.24	6.6	6.55	35.33	31.86	1764.79	1750.87	1478.37	1517.55	904.14	910.44	300.13	332.43	206.9	235.05	216.95	245.75
5699.77	5765.74	126.45	127.91	7.85	7.7	27.61	26.57	1249.46	1238.15	2420.53	2368.58	1510.28	1587.09	387.58	405.21	158.86	171.17	44	67.99
5438.92	5506.53	118.16	119.63	7.37	7.23	32.26	32.65	1675.93	1650.79	1852.76	1833.31	1209.4	1271.54	192.99	196.31	168.49	194.35	60.17	64.9
4918.44	4989.43	106.79	108.32	7.16	6.69	31.88	30.64	1523.71	1557.16	1821.8	1775.96	1211.06	1280.96	242.62	262.66	106.04	110.63	50.48	72.35
4944.55	5014.68	108.01	109.54	6.73	6.63	28.21	29.02	1581.75	1534.97	1839.58	1815.53	1106.16	1188.69	241.46	250.28	126	143.69	265.52	300.06
5353.32	5425.29	113.83	115.36	7.21	6.98	33.29	31.46	1366.99	1321.13	2128.65	2151.24	1436.75	1492.56	347.7	373.45	105.07	115.34	189.26	223.2
5851.26	5921.13	130.01	131.55	7.98	7.93	29.11	27.94	1274.68	1215.03	2353.95	2338.49	1511.76	1624.33	340.22	392.39	232.98	230.73	27.41	31.83
5443.89	5514.47	120.43	121.99	7.31	7.32	27.42	26.5	1603.6	1575.99	1917.93	1833.75	1376.14	1488.1	296.3	328.39	157.78	171.22	158.72	168.98
5431.88	5505.15	116.7	118.27	6.89	7.12	32.15	31.32	1793.36	1513.58	1890.74	2038.22	1060.43	1154.06	384.81	389.09	198.67	241.29	113.71	134.52
5899.06	5972.28	128.09	129.67	8.1	7.91	29.32	28.3	1310.86	1269.19	2010.35	1925.1	1949.25	2099.74	204.97	259.05	156.81	184.3	65.07	70.6
4830.3	4904.24	103.36	104.94	6.67	6.37	27.82	29.09	1844.41	1762.94	1442.68	1364.9	1121.28	1262.24	179.52	212.86	127.4	151.51	213.4	225.76
4530.71	4605.92	96.37	97.96	6.06	5.97	35.99	32.9	1822.92	1809.44	1435.7	1422.88	755.72	808.1	9.35	10.71	130.08	127.64	112.66	138.13
2597.14	2668.85	57.71	59.3	3.76	3.59	21.97	21.89	2022.34	2024.96	510.32	544.21	50.83	81.83	196.3	216.74	4.3	7.14	113.52	124.45
5163.82	5239.1	109.84	111.43	6.87	6.73	30.02	29.7	1676.9	1686.75	1977.4	1939.91	1011.14	1066.87	151.96	198.19	143.19	153.59	32.26	39.95
4743.4	4817.36	104.94	106.57	6.45	6.41	29.48	29.77	1642.26	1588.21	1762.34	1705.62	1052.81	1185.48	269.15	330.55	78.09	85.87	78.44	86.77
5362.9	5437.85	116.44	118.07	7.4	7.14	29.2	28.8	1496.5	1482.24	1812.58	1688.52	1607.37	1736.01	15.16	29.95	78.2	93.79	216.4	247.18
2909.9	2983.79	64.37	66.01	4.04	3.97	23.15	23.4	2042.01	1981.44	730.45	802.93	117.29	160.56	296.46	305.33	4.98	8.92	61.44	65.68
5188.53	5264.14	112.7	114.34	7.17	7	33.52	32.4	1648	1611.33	1765.57	1787.61	1131.66	1150.87	281.12	358.46	180.93	204.65	63.97	86.84
5342.79	5418.45	116.16	117.8	7.45	7.2	32.01	30.46	1465.35	1361.81	1781.87	1687.53	1487.18	1641.65	296.72	292.4	156.67	167.81	73.39	110.04
5585.54	5660.37	123.92	125.58	7.61	7.59	29.87	28.66	1356.12	1309.18	2209.99	2231.15	1542.55	1621.42	229.38	274.41	143.26	158.27	101.84	113.03
5054.99	5132.5	109.55	111.22	7.02	6.73	31.6	31.64	1811.64	1817.59	1666.19	1654.64	1137.32	1166.8	315.12	359.12	96.3	104.41	23.86	27.82
5458.49	5537.03	118.29	119.99	7.38	7.28	32.04	30.56	1649.84	1610.17	1911.35	1928.39	1144.02	1149.16	384.91	397.63	221.22	244.44	22.11	31.97
5798.7	5875.76	128.56	130.27	7.88	7.85	27.84	28.22	1301.41	1252.84	2318.93	2279.95	1600.43	1701.25	177.24	206.14	149.03	176.11	285.59	294.72
4736.73	4818.6	100.62	102.35	6.52	6.35	29.31	28.84	1750.96	1731.89	1834.6	1818.87	817.15	886.86	3.41	10.75	96.61	109.94	226.5	228.55
2479.95	2557.93	54.99	56.72	3.93	3.51	18.87	19.12	1818.71	1795.44	559.61	628.18	98.22	123.56	257	293.04	2	2	113.12	118.45
5433.41	5513.75	118.3	120.05	7.31	7.3	30.41	28.73	1387.06	1323.08	2131.86	2112.44	1426.46	1540.77	386.35	435.28	180.55	172.07	89.47	108.77
5901.3	5982.19	128.18	129.93	7.82	7.87	31.19	31.72	1658.22	1587.64	1943.96	1946.24	1389.26	1430.53	296.2	320.94	258	282.44	61.34	71.2
5566.89	5649.46	118.5	120.26	7.08	7.27	32.16	31.5	1727.82	1446.59	2008.47	2140.38	1125.4	1246.34	334.96	366.07	219.75	272	112.43	113.37
5847.21	5927.48	129.36	131.13	8.04	7.9	26.86	29.3	1188.44	1144.68	2470.9	2421.26	1686.85	1787.82	249.39	273.37	138.65	175.82	107.77	116.48
5168.6	5252.83	109.79	111.57	7.07	6.77	32.97	32	1514.44	1523.16	1848.14	1864.15	1248.16	1262.77	372.68	398.01	149.73	160.4	53.4	68.14
5502.02	5585.74	118.21	120	7.41	7.27	34.4	33.34	1576.25	1606.06	1757.77	1677.73	1481.99	1547.53	124.64	138.88	199.62	221.88	31.9	45.29
5212.66	5294.27	115.77	117.58	7.16	7.12	30.21	28.8	1459.46	1383.83	2122.86	2119.8	1388.41	1503.55	368.13	405.18	52.22	77.62	39.18	46.6
5785.07	5867.76	126.37	128.18	7.84	7.75	30.86	30.38	1452.82	1448.96	2054.91	2011.55	1480.66	1507.61	318.75	378.06	215.16	268.69	27.6	29.69
5339.52	5423.05	115.71	117.52	7.18	7.09	32.25	30.67	1586.15	1575.46	1894.4	1881.74	1266.6	1285.69	232.64	226.68	160.96	163.96	75.53	89.72
4838.86	4921.44	107.31	109.13	6.77	6.59	30.47	30.53	1789.66	1770.47	1554.67	1577.96	978.93	1017.96	195.3	238.56	169.44	203.91	65.86	93.6
5199.6	5281.76	115.46	117.28	7.17	7.08	27.34	27.68	1350.63	1278.03	2188.5	2179.39	1330.01	1438.61	292.73	294.52	102.89	107.22	8.89	10.63
5281.28	5363.5	117.24	119.07	7.25	7.18	34.38	32.47	1753.18	1754.98	1602.75	1536.18	1414.79	1524.63	405.65	393.42	139.38	166.42	123.91	127.31
5682.13	5766.14	123.5	125.33	7.56	7.55	33.18	32.29	1694.2	1615.44	1911.61	1982.78	1212.25	1235.18	249.83	258.31	242.02	292.15	67.14	79.36
5470.4	5553.79	121.48	123.32	7.56	7.42	28.52	27.79	1400.56	1409.68	2083.8	2000.26	1602.86	1733.74	166.21	191.95	71.91	86.13	104.64	134.4
4535.35	4618.2	100.57	102.41	6.36	6.16	31.14	30.28	1504.28	1433.28	1685.57	1695.26	1029.7	1129.98	471.33	511.79	85.63	80.9	61.7	76.22
5911.18	5996	128.39	130.23	8.02	7.87	27.79	28.98	1267.59	1184.91	2082.59	2103.73	1759.51	1801.53	203.94	219.59	256.76	284	51.07	62.3
5199.95	5283.15	115.36	117.21	7.16	7.12	32.32	31.9	1456.44	1365.06	2140.27	2172.88	1204.43	1310.69	164.5	180.58	93.02	101.9	91.87	112.07
4624.03	4709.64	100.46	102.32	6.48	6.25	27.17	27.04	1548.28	1509.46	1775.19	1810.21	1001.39	1064.45	201.02	221.12	110.81	117.12	50.9	65.24
5069.41	5156.48	109.86	111.74	6.94	6.74	27.39	26.35	1587.5	1570.08	1984.5	1953.28	1205.19	1294.5	305.5	334.35	69.09	85.52	170.43	208.51
5056.17	5143.2	109.57	111.46	6.86	6.76	34.43	33.55	1628.08	1627.55	1681.81	1666.84	1022.06	1056.95	246.9	254.66	133.12	162.79	90.67	91.79
5314.69	5402.06	115.44	117.33	7.16	7.08	31.77	31.39	1617.46	1573.01	1969.27	1955.04	1133.79	1216.73	268.43	275.55	120.78	174.08	222.66	254.05
5046.46	5134.07	109.61	111.51	7.01	6.71	28.91	29.2	1379.02	1324.45	1893.08	1881.49	1245.89	1354.14	312.39	331.52	146.93	179.99	17.5	23.49
5224.16	5312.43	113.58	115.5	7.12	6.96	30.57	29.84	1669.38	1580.4	1673.23	1661.41	1329.91	1432.3	210.55	238.09	149.77	198.03	247.59	283.1
5145.15	5235.41	111.71	113.66	7.05	6.85	29.41	29.63	1449.03	1458.76	1863.25	1819.29	1458.8	1528.07	199.42	227.75	102.19	120.01	161.97	177.17
4894.7	4985.91	106.34	108.32	7.09	6.65	29.62	28.62	1519.52	1521.29	1762.97	1733.28	1147.85	1229.69	214.52	251.44	152.51	160.54	120.26	150.11
5174.48	5267.3	111.21	113.2	7.15	6.86	29.17	29.23	1533.36	1517.6	1825.92	1789	1352.93	1460.08	135.39	208.8	139.99	132.69	139.55	149.62
4859.35	4952.04	105.65	107.66	6.27	6.55	30.58	31.25	1767.79	1369.32	2012.94	2042.47	835.93	1201.99	282.53	305.96	53.9	61.33	159.44	212.25
4891.78	4985.76	105.98	108.01	6.65	6.5	26.78	28.01	1681.23	1681.82	1690.89	1684.91	1083.32	1139.13	178.57	210.38	121.9	128.65	149.66	178.55
5116.82	5212.89	109.94	111.99	6.85	6.79	28.36	28.91	1549.6	1466.33	2040.55	2063.02	1259.92	1366.45	98.84	129.07	49	60.11	74.49	84.46
1215.73	1233.28	142.42	144.47	8.57	8.67	26.72	26.78	252.05	246.64	445.94	456.49	336.26	307.6	250.38	287.98	55.05	63.79	141.39	167.87
5219.78	5314.6	113.46	115.51	6.98	6.94	31.62	30.96	1613.69	1574.23	1757.28	1746.63	1437.98	1510.05	378.28	419.83	84.92	105.98	224.98	254.85
5614.3	5710.81	119.38	121.43	7.74	7.59	28.11	29.45	1452.38	1397.68	1786	1710.53	1741.49	1858.9	191.26	213.18	190.3	230.28	77.17	86.89
5008.43	5103.5	109.05	111.12	6.86	6.71	25.97	25.52	1433.59	1408.76	2103.24	2123.44	1221.62	1295.26	330.49	391.82	49.82	52.23	24.48	23.4
5531.22	5629.35	118.36	120.45	7.27	7.27	29.16	29.56	1538.34	1353.74	2046.16	2106.18	1310.79	1461.34	415.08	468.57	181.53	188.96	90.66	120.9
5238.36	5335.53	113.74	115.85	7.24	7.07	28.94	28.15	1690.99	1665.75	1618.45	1581.08	1291.27	1358.64	170.3	210.84	155.43	182.14	73.29	85.1
4719.04	4815.21	104.27	106.39	6.52	6.47	29.56	30.31	1641.69	1574.54	1566.27	1547.65	1098.55	1197.07	237.95	229.9	137.59	150.72	59.21	76.58
5586.53	5685.04	121.07	123.2	7.46	7.4	30.83	32.58	1410.5	1366.57	2229.74	2205.1	1488.8	1628.33	288.48	329.6	157.84	178.92	110.58	140.8
5598.91	5698.16	121.3	123.44	7.4	7.44	29.97	29.66	1467.65	1449.12	2265.76	2209.36	1448.92	1550.26	295.37	332.01	77.02	97.53	228.48	285.5
5161	5260.59	110.92	113.06	6.92	6.8	30.64	31.61	1512.49	1503.71	1872.46	1847.37	1267.35	1320.66	154.68	167.9	121.46	144.76	167.45	194.29
5392.72	5493.31	114.7	116.84	7.14	7.03	28.61	28.48	1410.85	1381.51	2246.6	2214.23	1438.88	1568.67	271.85	327.3	90.8	95.76	47.86	59.86
5135.48	5237.04	109.2	111.35	6.91	6.82	34.06	30.92	1714.47	1623.78	1680.73	1684.51	1125.45	1204.71	298.47	336.92	172.55	188.24	92.02	68.14
6049.83	6151.63	128.64	130.8	7.98	7.89	30.98	30.49	1230.42	1154.19	2560.23	2527.35	1720.13	1851.06	261.86	300.76	149.92	190.32	78.74	83.05
5079.26	5179.66	110.29	112.46	6.96	6.79	32.95	31.28	1680.74	1696.98	1590.68	1554.83	1159.82	1221.22	280.59	289.21	163.49	151.82	204.4	247.5
5337.91	5439.83	113.5	115.67	7.09	6.95	25.95	26.24	1337.39	1281.54	2225.78	2272.19	1360.68	1442.93	227.81	260.96	115.98	130.46	384.8	402.32
4978.6	5077.5	110.38	112.57	6.76	6.78	33.25	33.48	1768.61	1761.1	1708.96	1705.28	880.87	922.3	302.58	304.63	144.76	144.76	178.8	185.81
4951.44	5052.32	107.62	109.81	6.97	6.67	32.31	32	1661.08	1637.53	1558.7	1570	1074.11	1114.79	320.97	349.31	193	248.2	76.47	87.6
5521.22	5622.22	119.99	122.18	7.49	7.36	30.79	27.72	1424.15	1401.34	2084.74	2051.7	1323.41	1394.06	381.72	393.94	247.68	275.7	127.94	150.14
5198.96	5298.25	115.31	117.51	7.34	7.2	30.13	29.52	1434.69	1386.6	1879.81	1899.36	1188.46	1242.28	374	380.44	174.73	226.45	169.16	175.34
5732.03	5831.52	127.29	129.5	7.93	7.9	31.36	31.61	1453.82	1397.66	2181.01	2120.51	1392.61	1511.28	394.86	431.12	171.15	209.39	50.03	67.49
5650.76	5752.57	123.44	125.66	7.83	7.6	31.54	32.44	1324.48	1307.82	1872.25	1805.83	1685.94	1774.44	300.02	319.78	223.57	254.81	52.33	53.79
4978.29	5079.19	110.51	112.74	6.92	6.81	30.69	30.6	1756.49	1689.68	1744.57	1738.25	989.55	1098.13	324.3	368.45	113.16	148.88	195.85	216.71
5183.46	5286.77	112.55	114.79	7.02	6.92	32.08	31.57	1569.09	1550.96	1855.18	1816.74	1142.17	1190.82	445.4	457.18	151.34	191.93	143.22	170.54
6050.35	6152.9	133.85	136.11	8.21	8.17	31.81	29.27	1459.59	1433.9	2226.67	2198.3	1343.54	1411.97	214	258.82	350.17	396.69	103.83	110.88
4947.93	5052.69	107.43	109.7	6.8	6.71	27.84	28.3	1576.66	1521.72	1832.12	1840.58	1126.91	1213.11	143.23	155.13	121.08	131.57	67.47	93.08
4979.36	5084.98	106.98	109.25	6.8	6.6	28.27	26.75	1614.88	1608.18	1960.99	1950.19	1164.29	1264.91	269.22	310.04	71.49	83.18	119.9	174.39
5170.44	5273.57	114.68	116.96	7.19	7.07	32.8	32.18	1452.69	1392.82	1865.92	1829.16	1373.62	1482.3	529.43	605.26	118.33	138.34	171.02	186.43
6382.13	6485.07	141.59	143.87	8.85	8.7	30.83	29.38	1010.92	971.75	2675.63	2690.41	1866.03	1868.49	248.23	269.41	226.82	264.05	76.18	99.22
5274.89	5380.85	115.23	117.54	7.33	7.11	29.85	28.55	1546.68	1571.13	1902.11	1821.48	1348.3	1445.37	407.84	427.13	170.37	196.89	259.68	298.43
5717.99	5824.97	126.98	129.35	7.92	7.79	32.26	33.01	1348.11	1351.72	1898.98	1843.26	1750.59	1815.54	243.43	229.96	201.9	246.51	71.01	108.88
5045.91	5154.8	110.23	112.6	6.95	6.88	32.28	31.57	1553.48	1570.89	1750.73	1705.46	1017	1093.4	342.11	367.51	252.8	269.59	94.34	112.86
5350.13	5460.13	116.17	118.55	7.49	7.27	33.19	32.69	1450.98	1417.42	1859.75	1841.01	1309.84	1384.79	279.63	319.6	219.98	255.11	73.88	104.57
5209.74	5319.35	113.81	116.2	7.14	6.99	29.17	29.23	1345.16	1301.18	2071.12	2066.97	1339.54	1412.72	13.15	12.21	126.42	159.01	99.8	89.74
2344.14	2455.32	50.78	53.19	3.72	3.27	22.88	24.52	1806.88	1854.66	415.81	446.24	99.66	126.55	366.91	404.27	8.63	14.03	146.47	179.32
5634.5	5744.29	124.76	127.19	7.76	7.66	30.28	29.88	1336.59	1289.45	2141.06	2113.01	1524.69	1689.52	207.63	257.17	173.22	179.9	104.75	115.05
4724.21	4838.09	102.71	105.18	6.63	6.34	29.26	29.2	1489	1425.99	1811.76	1816.59	1048.63	1166.35	0	4.15	88.45	88.93	38.44	45.42
2269.53	2381.5	50.4	52.88	3.85	3.33	17.51	19.55	1744.33	1719.31	433.58	526.56	91.63	131.48	334.97	355.38	1	1	176.19	194.64
5353.54	5467.63	116.95	119.44	7.21	7.19	30.58	29.52	1515.86	1422.59	1837.09	1879.06	1195.05	1282.5	212.31	243.46	266.18	280.59	111.06	129.01
4813.33	4925.19	106.85	109.34	6.56	6.61	36.3	34.63	1853.05	1818.76	1525.28	1571.43	651.23	679.66	280.36	334.85	186.65	209.55	107.2	123.67
5427.41	5539.49	120.52	123.01	7.65	7.46	31.2	28.8	1291.31	1266.05	2137.61	2109.83	1354.89	1456.78	270.47	331.37	184.45	186.16	128.76	139.55
5351.46	5469	113.92	116.42	7.04	7.01	30.29	30.35	1782.07	1714.91	1856.67	1850.56	1234.17	1340.83	174.94	187.45	131.62	143.73	85.31	115.39
5111.23	5224.23	113.5	116.01	7.17	7.06	31.43	30.64	1378.22	1322.31	1940.27	1907.46	1373.09	1536.5	286.67	295.95	116.77	120.38	175.94	206.05
5145.6	5262.53	111.48	114	7.06	6.87	32.57	31.93	1570.88	1585.96	1871.65	1901.53	1083.35	1110.72	331.9	391.62	163.89	193.04	103.53	138.13
6001.32	6117.44	130.01	132.53	7.96	7.97	28.08	27.04	1324.01	1285.21	2582.82	2555.29	1521.92	1614.78	221.26	225.4	190.64	203.05	7.88	10.59
4906.3	5023.73	106.53	109.08	6.9	6.72	30.54	30.46	1486.4	1465.79	1796.21	1820.23	1227.4	1309.11	377.65	436.46	122.68	149.42	75.97	92.3
5645.15	5762.79	122.61	125.16	7.89	7.61	33.93	33.44	1320.91	1297.78	1752.95	1675.29	1822.83	1945.2	356.19	409.48	174.96	191.36	31.99	30.27
5986.82	6101.79	132.94	135.49	8.31	8.22	29.07	27.9	1119.29	1049.52	2584.09	2511.44	1576.32	1730.9	278.68	310.68	207.7	229.9	181.33	203.02
5271.46	5390.12	114.45	117.02	7.32	7.2	29.94	27.76	1381.6	1349.56	2078.78	2131.85	1288.16	1312.19	159.38	195.41	140.4	174.97	183.47	199.55
5313.13	5429.68	117.79	120.38	7.22	7.26	30.25	30.53	1301.28	1223.97	2432.14	2493.11	1256.68	1336.54	384.24	465.96	96.18	87.57	46.04	85.31
5975.24	6093.11	132.08	134.68	8	8.09	31.59	31.86	1449.92	1409.32	2255.99	2193.94	1526.52	1602.83	384.56	458.67	238.67	246.65	129.42	160.28
5414.92	5533.22	119.03	121.63	7.46	7.33	32.49	33.48	1567.51	1583.32	1728.91	1660.81	1404.27	1473.31	309.39	327.34	158.65	170.67	127.05	156.63
5532.9	5650.48	122.75	125.36	7.66	7.58	30.32	29.7	1444.95	1413.99	1870.17	1825.12	1689.08	1830.3	305.19	333.9	143.13	154.5	189.61	226.81
5215.6	5335.57	113.31	115.92	7.17	7.03	36.08	34.2	1595.18	1535.49	1817.39	1842.43	1057.68	1121.2	303.13	350.46	180.49	204.13	152.72	154.85
4825.81	4947.56	103.72	106.33	6.94	6.49	30.2	31.93	1527.13	1547.37	1497.36	1437.65	1324.77	1372.15	266.85	291.21	102.4	131.03	85.12	96.45
5129.61	5247.64	113.97	116.59	7.1	7.05	29.94	29.48	1765.31	1695.56	1682.82	1740.49	1195.29	1240.53	241.73	254.04	125.01	166.99	76.56	90.88
4926.89	5047.29	109.29	111.95	6.8	6.73	29.3	28.62	1834.38	1785.24	1655.24	1657.04	1025.57	1132.88	185.98	212.51	96.09	113.52	127.72	137.97
4791.35	4914.61	104.14	106.82	6.64	6.44	31.02	31.72	1815.95	1791.26	1611.91	1635.27	918.11	989.26	221.99	276.04	159.59	196.57	210.36	253.61
5010.65	5134.95	108.8	111.49	6.67	6.89	31.39	30.96	1743.99	1430.85	1671.54	1697.96	1094.83	1389.16	215.52	249.67	131.84	161.63	151.93	200.88
5201.26	5323.66	115.16	117.87	7.27	7.2	28.38	27.68	1497.26	1455.4	1828.73	1790.48	1459.86	1596.49	180.55	226.13	95.13	116.57	235.23	276.48
4824.62	4951.41	103.24	105.95	6.3	6.39	30.66	30.74	1809.6	1559.41	1722.77	1792.11	963.93	1166.55	15.42	29.19	109.33	161.78	180.8	197.81
2521.62	2646.79	54.64	57.36	3.72	3.49	21.12	21.2	1939.13	1997.29	409.89	425.47	156.58	191.31	191.59	214.04	0.6	3.52	85.34	95.89
4995	5122.41	107.35	110.09	7.02	6.71	29.86	30.82	1459.79	1465.55	1877.17	1853.29	1141.48	1247.99	193.13	222.32	148.77	146.9	53.26	75.72
5260.39	5386.16	115.64	118.39	7.08	7.14	30.76	30.49	1496.11	1449.81	2158.48	2197.13	1177.56	1244.02	255.23	287.84	124.05	143.86	98.43	102.71
5250.6	5375.73	116.47	119.24	7.16	7.17	31.22	31.64	1571.34	1525.12	1866.38	1827.18	1324.39	1450.82	362.52	377.39	126.06	161.09	129.65	170.89
5694.61	5820.45	126.42	129.21	7.68	7.76	31.25	31	1458.74	1415.9	2006.69	1956.06	1572.28	1712.64	2.77	9.08	165.62	218.92	92.84	114.5
2805.22	2931.29	62.11	64.9	3.99	3.93	22.81	23.11	2020.34	1982.56	624.91	731.06	151.14	200.62	192.12	224.81	6.07	7.97	160.9	200.76
5239.44	5365.63	115.91	118.7	6.88	7.14	30.29	30.17	1660.2	1417.47	2024.17	2035.94	1170.98	1459.1	274.3	297.34	106.67	112.92	110.07	133.53
5124.89	5254.24	111.39	114.2	7.08	6.9	32.56	31.32	1569.79	1569.43	1721.21	1735.53	1215.24	1257.83	311.73	339.5	168.41	188.06	111.72	143.74
5185.57	5313.52	115.17	118	7.04	7.14	33.17	32.54	1549.51	1457.17	1829.96	1819.37	1233.78	1366.82	125.52	144.95	157.07	192.53	57.68	84.86
4474.54	4605.14	97.19	100.02	6.27	6.08	25.83	25.85	1581.94	1550.1	1827.74	1847.56	892.39	1005.62	349.01	413.23	39.08	46.31	8.54	19.8
5758.78	5851.94	125.04	127.88	7.88	7.76	28.26	26.68	1262.75	1178.04	2215.13	2170.17	1714.54	1833.74	326.29	370.48	141.38	164.46	7.44	14.64
5353.77	5482.99	118.9	121.76	7.39	7.34	27.85	29.52	1258.64	1186.52	2328.55	2329.06	1294.77	1418.41	233.11	254.99	113.52	148.24	62.96	67.58
5340.63	5473.69	115.96	118.85	7.34	7.34	31.74	31.39	1450.26	1362.18	2021.8	2009.64	1317.9	1496.84	212.16	209.38	136.23	147.01	53.41	81.51
4847.43	4981.11	105.26	108.15	6.72	6.54	30.98	30.67	1537.62	1538.59	1768.7	1790.08	1028.09	1098.35	335.51	390.01	117.38	145.18	106.53	118.66
5786.22	5919.85	125.77	128.67	7.83	7.77	27.31	28.62	1342.85	1296.88	2303.63	2326.17	1586.4	1629.51	270.25	298.62	171.8	191.97	81.76	97.3
5167.66	5299.07	114.62	117.53	7.11	7.1	32.13	31.46	1421.39	1381.65	2065.37	2085.57	1104.65	1172.68	217.6	225.51	176.57	200.28	65.89	69.88
5093.19	5226.26	112.67	115.61	7.02	6.97	33.29	32.44	1783.99	1755	1633.76	1634.98	1168.79	1279.57	386.67	440.62	162	174.58	157.79	199.66
5864.57	6002.77	127.38	130.37	7.88	7.86	28.91	28.37	1472.07	1416.95	1916.81	1914.52	1594.41	1670.66	170.48	187.05	304.99	333.2	66.65	78.85
4683.8	4823.95	101.76	104.8	6.7	6.4	31.5	30.28	1468.33	1459.25	1862.89	1928.53	936.11	993.33	202.06	235.7	93.27	100.95	23.6	29.29
5336.81	5479.99	113.48	116.52	7.33	7.17	30.68	30.13	1373.6	1303.96	2160.58	2182.21	1358.18	1491.87	165.66	173.63	157.27	169.81	66.89	100.81
4544.57	4685.65	98.68	101.74	6.38	6.19	29.4	29.2	1744.41	1717.64	1563.85	1584.02	892.77	988.44	291.33	311.35	101.31	131.03	271.08	311.76
5262.76	5405.91	114.38	117.48	7.2	7.09	30.3	28.94	1734.74	1734.89	1636.87	1630.81	1274.97	1375.26	252.04	298.33	197.12	215.62	39.71	56.83
4794.43	4939.14	103.04	106.15	6.38	6.46	32.49	31.93	1839.11	1672.49	1393.91	1523.15	938.1	1022.79	312.6	383.44	160.91	168.78	183.78	230.25
5725.88	5869.87	126.95	130.13	7.76	7.83	32.8	31.03	1370.25	1325.27	2223.69	2213.2	1456.24	1506.13	300.16	388.14	211.17	240.95	237.3	268.48
5119.23	5269.11	110.02	113.24	6.8	6.86	34.51	34.31	1769	1709.17	1530.85	1535.33	1093.8	1172.31	240.51	254.12	190.18	187.69	104.39	113.58
4828.08	4980.57	102.78	106.02	6.54	6.43	33.55	31.36	1683.25	1701.85	1634.02	1669.57	917.66	969.36	197.02	253.51	171.83	187.86	28.5	47.03
5437.12	5583.82	120.59	123.84	7.54	7.52	29.55	29.34	1399.54	1380.7	2102.67	2095.62	1523.71	1609.5	226.54	255.31	128.85	148.59	9.75	19.83
5031.44	5178.33	111.21	114.46	7.02	7.04	27.04	24.12	1755.64	1705.39	1663.1	1653.05	1188.68	1307.59	205.98	276.42	144.22	181.28	159.69	215.41
4933.07	5083.27	107.15	110.41	6.77	6.7	30.75	30.1	1602.32	1568.27	1751.07	1734.31	1125.91	1256.73	369.99	432.74	149.36	144.83	131.67	134.8
6322.52	6471.23	140.18	143.47	8.53	8.65	29.69	30.71	1173.44	1095.58	2625.53	2642.81	1803.86	1892.67	214.99	262.7	220.04	236.55	164.65	182.74
5087.29	5236.15	112.98	116.28	7.11	7.08	30.11	31.39	1575.82	1495.71	1949.66	1925.47	1160.97	1330.99	360.52	407.07	93.01	106.79	67.99	79.89
5285.03	5434.13	117.23	120.54	7.36	7.28	33.62	32.9	1575.25	1563.03	1448.93	1400.72	1508.38	1578.95	327.43	351.34	231.04	283.61	47.32	58.97
5098.47	5248.92	113.22	116.56	7.12	7.04	30.41	30.64	1451.47	1378.23	1879.94	1945.85	1240.11	1324.61	263.93	297.23	89.45	115.37	90.26	118.64
5645.99	5803.51	120.05	123.4	7.55	7.42	30.21	30.24	1351.57	1339.91	2190.34	2151.78	1538.09	1662.7	267.29	265.45	190.34	208.15	26.52	36.32
5194.62	5346.06	115.37	118.73	7.07	7.22	31.28	30.35	1502.46	1276.97	2125.62	2244.84	1102.39	1274.16	222.42	242.42	139.18	199.77	46.57	51.03
4997.09	5152.07	108.49	111.85	6.78	6.73	25.6	26.64	1498.04	1487.99	1950.13	1943.64	1232.34	1357.75	89.4	105.11	85.62	100.47	122.9	137.51
1562.15	1608.95	113.26	116.64	6.78	7.01	25.02	26.1	432.82	387.39	737.22	759.19	263.31	307.79	158.88	174.11	31.96	34.84	117.24	154.73
4832.8	4991.87	102.79	106.17	6.48	6.41	31.89	31.28	1567.03	1486.9	1982.56	2068.28	995.5	1125.24	307.05	355.23	65.87	69.76	63.6	75.33
5244.25	5397.47	116.32	119.71	7.23	7.24	30.24	29.52	1500.34	1449.96	1880.55	1848.44	1342.12	1456.98	219.26	232.29	160.78	205.35	53.63	58.6
5175.92	5330.14	114.5	117.91	7	7.08	28.36	28.4	1529.41	1412.44	2334.23	2314.33	870.51	1090.37	202.07	237.34	115.99	162.06	12.02	14.22
4998.87	5153.2	110.89	114.3	6.92	6.91	31.78	31.57	1528.19	1472.37	1998.26	2068.1	1109.23	1196.14	232.9	285.25	79.36	81.96	51.12	61.1
4985.13	5145.62	106.12	109.53	6.62	6.66	28.98	28.69	1657.23	1564.04	1858.11	1907.11	1035.63	1175.72	263.82	305.27	135.37	143.63	107.3	126.56
4845.08	5006.15	103.68	107.12	6.66	6.54	29.78	29.41	1662.3	1423.94	1631.76	1764.27	991.7	1137.36	314.71	397.83	137.7	175.65	213.33	249.08
5231.31	5387.5	116.03	119.49	7.34	7.22	28.87	29.2	1370.24	1279.38	2060.14	2086.62	1336.25	1437.5	193.64	246.19	83.31	107.34	89.77	111.74
4933.95	5094.47	107.13	110.61	6.8	6.69	28.9	28.51	1515.11	1486.55	1689.14	1715.39	1460.26	1560.43	197.73	215.81	52.2	56.62	161.48	208.2
4909.95	5070.67	106.65	110.14	6.72	6.79	33.9	30.46	1704.92	1670.53	1768.51	1731.55	1054.82	1208.27	331.05	348.73	117.09	143.71	94.32	106.79
5308.5	5470.81	115.39	118.91	7.35	7.22	33.48	33.55	1566.3	1524.53	1737.7	1790.95	1201.69	1287.31	298.55	341.61	200.69	207.55	30.95	34.22
5458.76	5622.7	117.28	120.8	7.37	7.28	26.23	27.22	1479.05	1460.83	1990.95	1904.37	1559.94	1760.63	327.97	395.07	90.56	98.43	103.95	155.92
6003.96	6164.26	133.28	136.83	8.12	8.22	30.53	30.38	1465.5	1386.88	2230.33	2264.38	1595.08	1672.98	319.24	343.74	201.3	214.7	168.34	195.91
5321.55	5485.41	115.32	118.87	7.46	7.39	29.87	30.64	1475.42	1493.69	1750.99	1744.51	1315.35	1398.53	368.98	404.66	223.25	236.46	24.75	58.74
5523.81	5684.73	122.2	125.76	7.65	7.56	30.1	29.99	1346.21	1306.6	2029.27	2055.6	1436.03	1537.49	246.49	285.03	238.92	266.79	74.44	83.79
5676.44	5838.01	126.06	129.64	7.83	7.87	27.06	27.76	1306.06	1225.75	2235.54	2199.98	1772.27	1957.2	165.52	207.66	87.57	123.03	44.65	50.07
4736.93	4902.05	102.91	106.5	6.45	6.4	25.33	25.24	1508.57	1398.61	1967.05	2018.87	1011.25	1152.04	276.86	321.65	74.79	105.04	128.81	159.29
5544.88	5711.41	120.39	124.01	7.46	7.47	30.99	31.64	1424.7	1362.92	2219.77	2178.39	1276.61	1400.47	269.98	349.05	187.25	232.58	27.12	48.62
5323.68	5488.59	118.23	121.88	7.24	7.38	31.44	31.25	1498.5	1366	2087.55	2157.52	1195.94	1322.58	283.29	335.25	140.04	158.63	99.94	136.16
5187.12	5358.81	112.37	116.09	6.98	7.04	32.59	31.86	1673.89	1601.74	1783.74	1824.79	1143.32	1236.89	233.76	246.73	138.23	177.39	92.33	113.36
5075.39	5248.12	109.99	113.73	7.04	6.95	30.35	28.55	1437.31	1426.71	2010.13	2008.15	1209.1	1364.92	118.88	156.71	117.09	121.72	4.27	8.67
5052.79	5226.48	109.76	113.52	7.06	6.94	28.92	28.94	1440.1	1447.86	2223.32	2185.2	1186.78	1329.63	339.26	369.02	36.38	48.11	125.36	153.72
5050.56	5226.04	108.51	112.28	6.85	6.79	29.56	27.4	1730.79	1679.31	1641.53	1699.84	1050.61	1119.72	222.92	254.68	198.1	239.5	191.52	249.94
4959.81	5134.65	107.49	111.27	6.75	6.74	27	26.28	1556.21	1474.11	1934.77	2038.99	1127.33	1232.48	167.12	189.63	92.07	98.08	176.52	181.29
5471.09	5646.79	118.56	122.36	7.44	7.4	28.87	28.12	1476.04	1483.64	2222.89	2197.87	1473.35	1600.73	145.16	172.42	85.13	123.9	62.72	75.45
4211.86	4387.35	93.26	97.14	5.91	5.96	32.19	33.05	1876.84	1866.59	1262.17	1313.77	685.56	754.27	487.39	489.63	119.23	142.8	37.17	50.87
5862.04	6038.3	130.05	133.96	8.03	8.07	30.47	30.49	1320.32	1286.79	2189.67	2141.78	1527.66	1687.87	315.2	336.59	219.76	277.5	77.75	84.98
5481.91	5662.4	118.8	122.71	7.57	7.44	29.4	28.66	1259.83	1197.12	2403.28	2469.14	1322.38	1444.91	154.48	204.56	117.61	139.3	211.66	263.95
5109.55	5288.68	112.95	116.9	6.99	7.03	27.73	27.79	1431.36	1360.02	2092.07	2050.61	1327.11	1537.21	156.15	214.3	50.89	77.68	175.01	210.47
4862.86	5043.75	106.9	110.87	6.65	6.73	25.74	25.63	1588.93	1493.1	1832.84	1865.2	1170.55	1340.87	280.97	327.2	102.36	116.06	122.11	170.92
5744.89	5924.15	127.52	131.5	7.83	7.9	28.22	28.4	1326.9	1247.33	2474.62	2470.06	1422.08	1603.95	208.52	239.89	189.2	214.49	149.76	185.27
5376.1	5558.24	118.18	122.18	7.29	7.35	32.49	32.15	1637.21	1619.24	2061.01	2005.78	1253.33	1436.14	389.68	422.32	108.73	130.62	32.4	46.59
5700.01	5881.44	126.46	130.48	7.94	7.86	31.69	30.31	1323.16	1323.87	2131.62	2122.97	1395.53	1477.11	321.74	393.99	246.7	286.1	184.34	208.13
5876.55	6058.86	129.89	133.92	7.89	8.04	31.38	30.6	1388.34	1323.05	2203.92	2183.25	1721.82	1871.45	260.75	306.02	150.95	175.38	198.39	229.29
5107.72	5293.39	111.05	115.08	7.38	7.04	32.8	30.82	1295.5	1254.18	2026.16	2016.32	1186.37	1341.84	101.47	125.04	177.46	166.84	51.97	62.71
4858.78	5045.96	104.42	108.45	6.73	6.59	29.65	29.23	1510.27	1482.05	1854.39	1874.62	1231.79	1388.81	193.66	196.05	66.56	68.65	110.1	150.86
5048.51	5232.57	110.98	115.02	6.97	6.91	27.08	28.26	1475.47	1444.37	1982.22	2022.85	1271.29	1401.89	259.18	279.41	94.92	133.19	100.33	138.49
5241.45	5424.26	116.27	120.32	7.28	7.28	28.34	28.58	1428.52	1347.07	2119.48	2085.2	1114	1306.5	348.4	375.05	216.31	250.15	25.98	29.9
5450.1	5637.06	118.11	122.16	7.23	7.42	34.05	32.65	1661.22	1484.9	1752.25	1830.09	1290.69	1469.89	203.1	223.86	229.2	281.22	38.8	51.92
2947.65	3049.27	119.81	123.92	7.32	7.46	27.44	26.71	838.85	805.49	1046.94	1027.33	714.25	799.23	252.63	293.48	119.76	134.62	63.64	73.17
5158.11	5344.18	114.11	118.22	7.07	7.12	29.31	29.02	1797.68	1739.18	1666.31	1684.19	1222.13	1377.19	266.13	312.87	144.92	166.34	241.18	301.84
5230.29	5416.86	116.1	120.24	7.18	7.22	31.36	31.86	1399.77	1310.85	2230.28	2293.55	1198.32	1345.14	224.9	231.04	91.15	104.38	42.32	50.53
4767.75	4956.33	105.39	109.55	6.61	6.65	33.54	34.42	1674.28	1680.63	1752.46	1751.49	849.07	932.8	233.01	321.28	138.23	201.08	191.67	227.64
4803.96	4996.45	106.15	110.4	6.66	6.67	27.23	28.19	1384.54	1320.08	1977.09	2025.17	1100.65	1192.88	240.43	239.98	81.56	88.42	136.55	169.32
5346.05	5542.06	116.23	120.49	7.08	7.26	31.41	29.88	1529.71	1275.87	2149.74	2221.26	1191.25	1467.26	235.06	257.84	134.99	201.52	111.75	137.64
5009.73	5209.39	108.84	113.17	6.49	6.82	31.24	30.24	1800.2	1599.19	1694.28	1829.24	1072.17	1206.61	25.87	29.91	115.68	203.15	33.48	52.54
2614.98	2811.65	57.97	62.33	3.87	3.78	25.74	25.88	1841.44	1906.19	590.79	673.72	141.08	176.98	263.54	280.88	11.54	16.18	65.58	91.56
5200.12	5405.75	110.46	114.82	6.95	7.01	29.17	29.09	1663.89	1533.32	1737.35	1820.84	1202.52	1393.07	323.04	350.23	207.46	223.93	58.4	89.6
5305.69	5503.9	117.28	121.65	7.45	7.38	30.37	30.6	1433.18	1411.69	1890.64	1926.11	1204.55	1308.72	236.04	276.85	262.77	257.22	104.82	142.9
5235.13	5432.48	116.32	120.7	7.22	7.3	32.75	31.18	1476.71	1415.05	2042.44	2092.86	1148.09	1276.01	156.96	196.18	155.33	190.41	218.76	259.36
4783.83	4983.64	105.92	110.34	6.59	6.64	29.78	29.81	1547.05	1461.27	1839.96	1936.07	1087.09	1192.76	158.63	201.84	90.05	121.91	42.88	37.42
4731.35	4935.16	102.77	107.19	6.57	6.56	28.5	28.08	1514.52	1458.76	1792.35	1798.21	1167.16	1348.96	281.25	357.29	61.52	76.52	90.94	101.47
5064.57	5266.8	112.44	116.92	6.99	7.05	28.89	29.48	1450.67	1413.72	1888.91	1938.38	1254.78	1310.02	499.49	551.59	111.21	162.42	143.3	169.89
5899.28	6102.76	130.88	135.39	8.06	8.18	30.83	30.89	1398.7	1281.76	1904.3	1874.55	1585.38	1815.26	264.6	277.83	299.76	315.64	50.9	90.62
4690.63	4894.87	103.76	108.28	6.48	6.53	31.67	31.54	1652.53	1590.24	1568.38	1630.79	851.01	981.14	260.66	301.87	179.1	204.4	89.76	127.34
5313.96	5522.59	115.51	120.03	7.3	7.3	29.88	29.92	1520.89	1454.24	1868.94	1919.7	1328.73	1462.87	381.98	427.48	212.65	213	193.12	225.35
5417.69	5623.34	120.31	124.87	7.52	7.56	29.99	29.88	1457.76	1350.25	1719.31	1747.38	1481.5	1662.33	257.11	336.07	227.39	250.63	135.63	179.05
3706.08	3843.19	123.87	128.44	7.78	8.04	30.38	28.19	861.73	718.5	1562.43	1616.85	911.72	984.74	240.48	290.84	80.7	140.44	165.28	212.63
5213.89	5429.29	110.9	115.48	6.86	6.99	30.27	30.1	1667.71	1599.29	1815.24	1878.02	1153.68	1279.24	276.38	286.42	152.44	173.77	79.19	64.38
5390.02	5596.9	119.56	124.15	7.34	7.48	32.68	30.64	1603.42	1544.91	1850.83	1862.66	1268.58	1453.12	163.05	206.99	192.41	220.5	110.88	150.38
5076.33	5292.06	109.06	113.7	6.7	6.84	28.2	28.3	1554.17	1415.83	2228.13	2322	983.52	1175.72	208.78	226.68	95.5	108.8	131.3	164.37
4864.93	5078.83	107.92	112.65	6.7	6.77	31.69	30.89	1664.51	1609.54	1727.57	1784.84	1040	1171.12	263.18	310.38	113.97	135.79	137.57	163.16
5345.4	5561.71	118.11	122.89	7.4	7.42	31.87	30.6	1350.77	1249.32	2286.46	2333.87	1186.54	1331.81	197.27	245.38	158.13	197.85	52.4	70.61
4918.94	5135.77	108.73	113.52	6.78	6.83	27.42	26.57	1551.46	1520.56	1895.06	1934.36	1176.02	1326.18	184.15	212.88	73.15	79.4	83.46	122.74
5240.44	5457.09	116.44	121.24	7.22	7.28	27.1	28.12	1363.23	1330.3	2309.85	2308.07	1248.48	1448.18	309.81	356.55	95.93	105.75	121.03	141.6
5754.58	5977.82	127.86	132.81	7.85	8	30.77	30.89	1321.9	1242.2	2426.35	2454.7	1527.94	1691.28	272.47	312.76	104.94	159.93	38.42	75.61
5352.18	5577.49	118.71	123.7	7.5	7.54	31.52	31.03	1459.74	1362.52	1857.65	1882.47	1330.12	1517.71	251.36	281.48	191.01	200.2	121.92	175.21
4966.9	5194.92	110.18	115.23	6.74	6.92	29.98	30.02	1670.97	1643.94	1737.42	1716.69	1185.92	1359.18	278.63	318.31	78.91	143.09	13.29	34.58
4956.83	5195.43	105.4	110.47	6.73	6.78	30.83	29.41	1668.71	1474.24	1751.16	1875.95	832.1	1039.68	341.19	351.74	234.56	259.6	290.33	344.46
5297.51	5534.6	115.02	120.16	7.03	7.26	32.23	31.36	1606.4	1523.82	1904.65	1946.65	1088.24	1273.37	259.85	301.06	220.47	269.69	159.18	181.74
5267.94	5501.83	117.05	122.24	7.21	7.35	31.24	31.1	1533.96	1480.15	1972.64	2073.53	1258.08	1344.65	240.16	300.74	131.66	164.8	194.67	222.93
5559.46	5802.58	122.21	127.55	7.55	7.67	27.03	27.5	1319.99	1239.46	2437.67	2425.7	1429.46	1674.62	206.04	257.29	98.7	109.52	65.84	96.36
5308.08	5550.38	117.53	122.89	7.23	7.42	31.03	30.35	1466.46	1360.15	2032.15	2030.67	1379.27	1651.03	304.98	352.3	158.59	159.69	129.56	160.8
5635.46	5891	124.52	130.16	7.53	7.81	35.64	32.94	1440.62	1321.76	2086.07	2055.5	1641.06	1901.33	232.02	278.35	104.34	170.51	225.93	256.65
5104.36	5363.19	113.17	118.9	7.11	7.22	29.25	28.98	1452.91	1363.77	2003.77	2152.55	1178.85	1281.12	308.31	333.05	131.99	144.49	101.67	130.91
5355.01	5614.43	118.87	124.62	7.37	7.52	31.37	30.85	1420.38	1374.8	2002.16	2094.64	1218.64	1364.93	225.28	278.03	186.76	187.66	178.01	233.58
5181.11	5447.1	112.28	118.04	7.14	7.15	29.49	29.38	1337.03	1278.3	2326.4	2397.95	1179.17	1374.89	214.84	285.69	70.35	80.5	123.59	165.18
5002.43	5264.54	110.53	116.32	6.78	7.02	29.71	30.06	1732.1	1490.44	1602.4	1881.05	1214.27	1349.43	205.37	211.07	147.88	156.46	114.51	199.65
4517.98	4780.11	99.95	105.74	6.23	6.38	31.29	32.26	1719.43	1714.82	1453.51	1461.16	855.91	1046.62	411.79	515.2	140.46	176.54	9.84	16.58
5473.93	5737.04	120.95	126.76	7.5	7.63	29.82	28.84	1537.46	1426.69	1969.44	2065.31	1344.3	1426.86	352.87	368.18	160.04	212.36	58.52	24.63
5197.71	5466.82	114.26	120.17	7.23	7.24	29.92	30.6	1465.77	1496.34	1925.72	1898.52	1181.05	1355.85	337.24	362.62	182.53	220.59	10.46	14.74
5318.83	5588	117.98	123.95	7.39	7.48	30.84	31.07	1506.05	1503.97	1722.57	1742.88	1327.4	1489.62	331.74	389.48	232.45	263.57	106.94	115.83
5403.12	5673.79	119.98	125.99	7.35	7.61	31.83	30.42	1503.11	1354.66	1968.51	2124.6	1240.61	1375.22	367.43	426.48	223.52	250.78	26.23	25.03
5360.29	5632.33	118.58	124.6	7.12	7.49	34.06	30.24	1691.06	1465.96	1713.73	1898.94	1246.21	1396.3	173.68	228.1	176.57	232.02	100.93	102.57
5130.56	5403.76	113.75	119.8	7.16	7.21	31.7	32.15	1369.11	1322.3	2210.89	2289.1	1241.69	1414.6	194.39	247.93	56	85.28	165.61	192.61
4967.61	5243.72	109.89	116	6.59	6.98	32.02	31.18	1683.97	1461.02	1979.62	2093.29	879.85	1118.87	222.77	265.61	118.89	172.22	98.68	95.28
5139.07	5421.28	111.37	117.48	6.96	7.09	30.56	29.41	1595.67	1536.74	1843.86	1918.36	1211.96	1361.01	356.04	413.78	133.52	175.2	41.55	46.03
5238.51	5523.98	112.55	118.68	6.97	7.2	31.94	30.24	1694.16	1608.13	1730.2	1796.91	1084.25	1251.92	254.65	283.88	236.29	290.08	68.3	87.23
5339.73	5619.72	118.53	124.74	7.38	7.49	28.2	28.12	1392.69	1344.28	2061.88	2123.88	1478.97	1659.18	278.97	335.62	99.14	137.88	216.95	232.75
5818.47	6101.9	129	135.28	7.96	8.17	30.96	32	1293.35	1155.54	2375.13	2405.01	1612.96	1892.33	292.25	408.37	174.61	190.66	1.56	7.59
5202.36	5496.33	114.36	120.82	6.88	7.26	32.3	31.97	1686.3	1575.06	1722.85	1814.09	1195.62	1335.5	217.91	259.44	184.32	221.7	54.28	64.96
4796.68	5089.22	105.99	112.45	6.76	6.78	27.78	31.03	1638.47	1496.09	1825.23	1966.03	996.58	1187.3	271.83	325.47	80.06	104.75	4.16	6.63
5029	5323.4	110.55	117.01	6.59	7.05	32.96	31.86	1863.43	1621.12	1677.44	1868.14	921.05	1109.73	202.33	234.92	173.33	223.73	13.97	18.45
4669.56	4972.77	103.75	110.48	6.56	6.68	28.35	30.06	1474.71	1413.52	1926.42	1994.55	948.72	1187.43	242.84	311.16	104.11	107.77	49.99	54.1
5432.49	5747.49	117.69	124.51	7.32	7.54	31.89	30.74	1609.25	1569.19	1892.18	2005.8	1145.62	1249.05	249.75	284.88	252.27	267.83	108.79	99.72
4964.21	5282.39	109.73	116.76	7.01	7.07	34.68	32.51	1530.27	1443.63	1835.47	1901.85	1068.66	1295.51	335.89	407.07	120.87	174.78	52.83	63.12
5729.45	6064.55	127.23	134.67	8.1	8.2	30.78	30.6	1198.35	1011.2	2370.84	2429.2	1399.68	1711.28	157.85	187.53	230.03	282.86	272.78	297.25
4719.35	5066.21	102.51	110.04	6.41	6.71	28.68	27.5	1587.94	1413	2019.26	2149.32	765.32	1060.89	320.87	364.93	123.14	159.11	162.08	173.43
5378.91	5738.66	119.25	127.23	7.44	7.67	30.61	30.85	1430	1359.76	1965.83	1986.78	1310.89	1592.13	259.07	341.84	221.77	274.25	75.9	86.26
4698.42	5082.02	104.03	112.52	6.72	6.87	32.05	32.04	1639.54	1567.21	1467.1	1635	954.41	1087.89	352.97	460.88	152.36	193.42	148.49	164.59
5136.11	5541.09	111.58	120.38	6.96	7.28	32.41	31.86	1629.84	1524.83	1781.13	1877.71	1109.99	1323.42	306.32	458.64	160.5	223.34	107.8	118.96
5567.29	5971.1	123.58	132.54	7.5	7.96	32.03	30.78	1550.7	1458.24	1985.85	1970.27	1400.02	1670.56	222.41	308.33	146.38	179.81	79.73	89.82
5079.85	5486.62	112.81	121.84	7.1	7.39	29.92	29.99	1417.52	1255.53	1926.45	2088.69	1234.25	1478.33	324.47	338.36	155.62	190.57	96.5	104.32
5063.54	5491.82	112.4	121.9	7.02	7.38	30.42	30.53	1536.98	1451.11	1852.56	2018.91	934.39	1101.62	84.06	89.67	300.63	382.17	113.51	133.52
1553.89	1426.46	119.74	109.9	7.87	6.64	27.9	28.26	343.75	403.91	493.39	366.14	574.95	520.27	93.46	85.64	47.9	29.89	55.5	82.13
1333.45	1287.62	117.87	113.82	7.59	7.11	29.61	28.8	352.03	340.85	430.01	432.75	372.72	363.97	42.91	58.32	26.7	39.78	66.59	70.99
797.13	783.7	122.89	120.78	7.81	7.31	27.05	26.06	168.05	153.51	335.36	310.99	217.57	214.73	109.01	115.75	22.76	31.41	110.68	129.25
2869.58	2826.42	103.64	102.08	6.62	6.24	31	29.95	1102.04	1044.89	894.66	872.98	563.62	583.55	86.71	73.22	93.32	93.41	33.87	47.91
1906.76	1897.86	118.1	117.53	7.4	7.14	28.12	28.08	457.57	430.13	777.89	785.4	515.14	525.4	228.18	239.72	43.22	58.69	46.22	68.68
3688.82	3680.21	100.37	100.13	6.3	6.04	29.52	30.42	1642.11	1550.83	1055.27	1086.78	536.24	554.79	335.73	379.04	126.09	145.51	105.2	121.27
5901.42	5893.11	122.69	122.52	7.56	7.47	30.77	30.38	1699.68	1567.43	1961.27	1981.71	1556.04	1567.37	8.04	15.45	183.09	204.95	173.48	203.21
2772.25	2779.92	57.64	57.79	3.77	3.52	23.43	23.9	2108.66	2045.05	542.79	564.39	108.35	148.11	101.76	114.32	4.41	6.92	171.39	205.18
1285.6	1288.69	132.29	132.59	8.04	7.98	28.73	28.04	299.51	288.89	414.84	377.86	274.95	313.69	259.85	280.98	95.86	98.65	24.64	27.28
5561.64	5582.49	115.85	116.28	7.4	7.03	29.36	28.22	1367.56	1301.35	2376.09	2370.69	1422.38	1473.23	72.51	79.64	94.2	110.22	37.92	55.69
1448.88	1453.89	130.2	130.64	7.63	7.85	29.88	30.6	353.6	311.24	504.77	522.04	390.67	377.28	349.04	367.83	59.03	76.46	110.33	124.98
5137.88	5162.83	106.98	107.49	7.13	6.6	33.48	33.3	1702.14	1630.59	1466.56	1470.05	1155.4	1166.55	92.26	108.16	247.8	295.06	46.82	58.91
1722.79	1734.43	100.84	101.52	6.88	6.25	24.65	26.06	535.9	535.76	514.32	490.27	547.53	559.73	294.12	331.34	31.23	32.93	69.32	87.95
5691.07	5726.07	116.13	116.84	7.42	7.14	27.13	27.79	1498.32	1476.23	1968.12	1932.41	1688.57	1729.98	26.36	42.57	187.65	191.15	62.31	88.91
2812.28	2856.6	58.58	59.5	3.79	3.62	25.98	25.6	2083.68	2061.6	525.87	525.42	163.29	214.12	77.47	82.37	8.91	6.26	94.44	110.64
1488.7	1505.1	89.51	90.49	6.02	5.65	26.44	27.72	558.48	534.15	499.05	506.78	304.63	324.03	179.1	185.59	35.11	39.32	11.31	18.3
4544.56	4593.06	94.55	95.55	5.99	5.75	34.01	33.52	1801.86	1746.12	1591.73	1650.57	858.4	874.13	288.22	340.47	63.49	82.55	37.35	32.36
5431.24	5480.79	113.14	114.17	7.28	6.88	28.05	27.65	1488.84	1474.8	1845.5	1819.15	1536.48	1598.23	317.38	331.51	163.42	148.41	161.78	148.09
5303.19	5353.26	110.33	111.37	7.05	6.76	26.98	26.78	1570.42	1522.23	2108.39	2082.2	1149.59	1233.14	304.6	286.83	104.58	121.07	193.55	215.12
4919.29	4976.31	100.39	101.54	6.33	6.17	32.34	32.54	2039.07	2021.68	1299.61	1282.26	788.19	834.29	4.31	4.41	215.04	254	135.41	154.04
2420.92	2478.23	49.4	50.57	3.56	3.11	19.25	19.44	1835.28	1860.38	468.91	452.76	112.42	160.67	263.6	282.54	1	1	107.04	129.1
5198.36	5259.13	108.15	109.41	6.86	6.6	32.94	32.36	1758.39	1715.81	1601.94	1617.53	1264.43	1291.77	195.79	202.44	147.93	178.05	108.74	110.37
4867.15	4933.65	101.34	102.72	6.4	6.19	31.62	31.36	1770.65	1749.79	1744.61	1745.5	950.95	1005.93	130.7	139.53	129.25	143.74	187.25	198.71
2365.73	2393.93	127.8	129.31	7.74	7.77	30.81	30.28	638.05	622.4	821.33	801.74	500.65	530.94	173.81	185.76	126.5	134.73	17.58	24.43
3239.32	3285.79	106.24	107.75	7.01	6.67	30.36	30.67	1047.42	973.23	1011.41	980.17	792.98	895.34	112.4	144.49	105.9	132.34	72.31	91.63
4189.46	4264.85	87.16	88.73	5.84	5.41	28.45	28.62	1920.47	1901.47	1356.52	1394.42	655.19	674.43	146.72	163.46	65.15	60.22	163.25	203.67
2305.2	2336.31	121.41	123.03	7.87	7.47	29.68	29.23	569.07	574.35	701.71	665.41	737.03	750.64	235.95	246.68	54.16	78.13	62.97	73.49
4717.81	4803.27	98.28	100.05	6.54	6.08	33.17	32.29	1793.18	1787.31	1298.11	1276.79	1191.58	1273.42	230.41	235.22	85.49	85.55	58.92	76.88
3477.08	3535.09	108.93	110.75	6.92	6.75	31.47	31.93	1173.05	1143.48	989.32	978.62	859.45	907.85	207.29	229.4	169.35	187.79	176.2	183.11
4991.87	5083.25	101.87	103.73	6.69	6.31	29.22	29.23	1844.2	1832.58	1619.64	1599.06	1143.64	1218.72	252.29	269.81	110.5	132.5	144.74	198.31
4261.56	4334.38	112.51	114.43	7.11	6.97	29.51	29.88	1226.86	1131.48	1644.62	1704.31	861.2	914.87	189.17	214.05	165.91	184.66	62.25	75.9
4785.45	4880.62	99.68	101.65	6.46	6.18	27.55	27.97	2013.41	1985.69	1413.17	1402.8	1010.29	1084.98	239.42	235.1	125.53	145.19	196.71	222.84
4961.6	5057.28	103.15	105.14	6.54	6.38	30.65	28.84	1681.01	1591.39	1894.99	1918.96	964.17	1045.69	370.34	414.85	135.79	197.46	174.42	227.85
5721.19	5823.19	119.17	121.29	7.62	7.44	27.77	27.43	1446.2	1407.53	1880.09	1838.27	1700.36	1779.39	279.44	287.16	219	261.88	87.12	111.64
5145.93	5250.54	106.99	109.16	6.96	6.72	32.51	31.68	1669.93	1622.06	1618.92	1588.98	1251.83	1366.45	256.95	274.09	152.34	182.68	103.21	105.52
3452.52	3522.13	110.05	112.26	7	6.87	32.87	33.59	1186.63	1128.86	936.66	919.71	757.97	827.82	168	214.03	142.93	166.46	139.29	183.54
4252.78	4333.03	121.35	123.63	7.66	7.51	26.69	26.42	1010.75	1002.06	1812.9	1812.47	1179.07	1207.92	244.9	272.57	57.43	69.27	255.68	284.59
4792.33	4902.2	99.7	101.98	6.33	6.14	30.2	29.7	1730.08	1658.98	1519.34	1595.97	1147.09	1184.71	231.13	232.03	113.01	134.27	299.61	318.8
5269.61	5380.07	109.72	112.02	7.01	6.87	30.61	30.13	1467.25	1469.37	2099.69	2077.67	1222.78	1317.94	149.01	192.04	138.44	158.09	9.89	14.11
4811.51	4927.16	98.18	100.54	6.58	6.12	29.74	29.3	1619.55	1611.56	1631.53	1573.57	1245.81	1376.31	0.55	7.22	118.78	114.77	7.46	2.16
2436.61	2550.9	50.73	53.11	3.65	3.27	18.62	19.19	1938.72	1985.26	377.47	405.78	119.85	152.64	140.98	141.65	1	1	24.65	32.21
3047.18	3124.87	98.55	101.06	6.4	6.1	31.37	31.32	986.81	969.05	1200.92	1211.82	579.74	620.27	264.32	298.25	69.41	94.13	94.69	111.04
4899.46	5023.99	102.05	104.64	6.65	6.39	30.26	29.48	1564.82	1501.66	1820.24	1821.04	1080.62	1177.43	171.02	193.42	107.16	136.69	29.49	33.64
2615.22	2668.09	128.58	131.18	7.91	7.9	31.53	30.85	654.67	619.15	910.62	901.56	694.19	755.97	174.18	199.26	90.28	87.34	16.31	9.81
4832.75	4961.44	100.62	103.3	6.58	6.28	26.62	26.78	1563.93	1581.06	1718.19	1681.35	1306.96	1403.15	217.46	248.94	58.19	78.33	26.74	33.14
5074.04	5202.9	105.49	108.17	6.7	6.56	29.06	26.82	1594.42	1526.75	1879.13	1887.07	1223.67	1355.8	189.37	222.79	122.01	151.99	19.85	27.94
4540.94	4670.86	94.59	97.29	6.2	5.88	35.45	34.31	1797.76	1811.09	1404.84	1429.26	856.25	923.94	251.24	289.41	130.94	135.7	112.67	84.71
4974.06	5109.78	103.48	106.3	6.62	6.44	33.49	34.42	1743.58	1700.31	1611.75	1669.14	1044.99	1092.76	206.43	264.8	128.95	143.04	45.55	47.61
4666.14	4774.44	121.58	124.4	7.42	7.5	32.97	31.72	1211.91	1147.12	1794.68	1763.65	1235.51	1356.02	7.38	11.37	82.21	88.81	33.5	42.56
2407	2545.69	50.14	53.03	3.71	3.27	19.52	23.11	1842.36	1898.99	455.56	482.05	101.7	147.87	338.77	373.19	4	5.41	73.23	92.12
4905.7	5048.47	102.15	105.11	6.87	6.52	28.82	28.84	1694.86	1736.47	1388.47	1377.96	1176.77	1197.65	239.24	333.19	199.8	234.1	89.57	97.81
5661.89	5807.86	117.93	120.97	7.39	7.31	31.36	30.67	1550.3	1455.02	2086.79	2043.82	1536.26	1700.67	338.5	376.94	140.57	164.79	15.93	16.63
4875.41	5023.37	101.51	104.59	6.8	6.44	34.1	33.16	1700.72	1727.18	1438.3	1439.19	999.98	1049.7	125.33	166.34	210.66	231.65	120.5	108.77
1883.54	1933.34	117.53	120.62	7.36	7.27	25.39	25.96	493.36	478.73	579.35	543.49	584.33	629.35	249.42	317.01	83.59	91	55.82	50.09
4958.2	5111.85	103.15	106.35	6.9	6.51	29.74	28.98	1585.09	1552.51	1734.13	1726.56	1207.29	1301.31	269.16	282.17	109.95	122.84	109.53	119.99
4813.02	4967.1	100.06	103.26	6.39	6.26	33.7	33.44	1758.25	1763.23	1564.75	1596.89	919.55	973.84	98.25	125.45	138.06	147.29	69.66	74.47
1910.87	1963.19	117.72	120.93	7.07	7.26	32.58	32.62	659.03	635.49	667.85	673.55	368.17	392.12	346.87	378.67	54.61	63.08	89.61	107.58
5055.33	5213.08	105.26	108.54	6.79	6.55	28.59	30.53	1579.73	1581.27	1704.92	1683.14	1227.77	1279.39	355.78	401.37	137.13	213.74	202.08	225
5103.91	5273.19	104.15	107.6	7.05	6.61	30	29.38	1597.54	1618.42	1529.2	1553.17	1251.35	1300.15	207.8	235.85	193.84	216.96	3.59	7.56
4711.51	4879.78	98.13	101.64	6.26	6.21	31.06	30.67	1861.15	1836.6	1470.83	1489.59	867.33	948.79	262.47	301.14	159.66	170.63	58.33	63.46
5298.94	5490.8	108.13	112.04	6.98	6.78	28.73	28.12	1612.1	1593.02	1866.43	1839.59	1356.54	1530.85	280.01	323.36	139.14	150.3	51.82	49.84
4697.23	4903.34	97.85	102.14	6.71	6.25	32.84	32.51	1633.65	1652.87	1498.9	1566.26	864.6	934.31	294.76	324.05	223.37	203.68	194.42	203.54
5172.7	5408.33	107.54	112.44	6.83	6.86	30.7	32.33	1726.65	1627.76	1718.3	1803.64	1058.8	1174.57	267.84	324.19	199.77	250.46	17.62	9.2
5144.1	5389.25	107.14	112.25	6.85	6.77	30.44	30.46	1552.32	1480.01	1778.62	1734.16	1314.59	1575.17	266.71	296.65	143.61	164.09	147.35	197.97
5007.31	5254.46	104.3	109.44	6.59	6.65	29.89	30.67	1707.05	1618.68	1820.47	1915.39	931.8	1099.36	223.32	255.78	178.07	218.86	77.52	95.97
5193.22	5459.22	108.18	113.72	6.84	6.88	29.5	30.1	1685.64	1521.62	1832.72	1874.1	1164.14	1491.42	313.7	351.84	148.11	132.77	60.2	63.89
5217.15	5500.47	108.67	114.56	7.06	7.02	32.97	33.05	1628.89	1565.17	1695.33	1758.57	1131.77	1314.15	271.55	296.59	191.78	226.15	174.67	185.16
4933.54	5220.84	102.72	108.7	6.86	6.68	32.68	32.11	1721.44	1664.24	1408.91	1554.57	1030.94	1165.73	218.45	183.81	201.09	220.91	7.65	10.9
2513.91	2440.61	112.6	109.32	7.08	6.63	26.22	25.74	796.38	751.34	693.92	618.84	721.39	768.19	93.74	86.34	73.88	104.32	92.58	96.5
2067.48	2026.67	129.37	126.8	7.69	7.71	26.73	24.41	506.59	473.13	833.52	790.05	573.21	619.39	25.74	26.53	52.95	55.6	99.04	116.67
599.25	588.94	131.14	128.83	7.97	7.75	28.63	29.38	130.3	119.55	222.08	212.46	176.39	176.59	154.13	182.31	20.09	21.6	24.68	29.15
2491.76	2439.79	109.36	107.07	7.22	6.76	34.15	31.5	702.61	658.33	784.67	636.49	645.48	728.2	113.99	104.98	110.18	123.42	96.9	87.21
2014.95	1977.11	104.77	102.79	6.75	6.49	29.88	29.38	615.26	558.03	687	680.13	511.15	518.29	15.01	24.75	58.07	82.04	10.49	2.14
2888.83	2808.13	58.95	57.3	3.95	3.52	22.11	22.64	2077.61	2061.44	668.87	574.88	125.51	138.74	48.89	57.72	1.82	8.33	1.47	2.15
954.59	942.52	122.78	121.21	7.39	7.3	29.31	26.32	263.72	253.68	387.97	362.87	226.57	237.25	64.7	63.1	11.14	21.18	143.05	178.49
1399.31	1382.86	123.65	122.19	7.46	7.52	31.2	30.35	365.07	313.96	515.03	496.58	404.35	442.57	154.19	176.68	23.41	33.52	67.17	66.57
2922.95	2890.27	108.48	107.26	6.82	6.66	27.89	27.29	900.14	804.12	1093.11	1071.99	677.2	725.17	212.58	252.01	78.46	84.37	58.53	78.05
2958.67	2935.8	147.75	146.58	8.82	8.8	35.15	29.74	505.89	469.38	1097.97	1071.28	929.41	949.57	101.4	121.84	100.16	108.85	135.27	180.42
1389.17	1376.01	120.89	119.73	7.6	7.25	28.11	28.37	364.08	364.38	477.4	457.34	365.88	340.75	191.49	203.51	34.87	44.09	63.23	55.31
1976.44	1960.33	124.5	123.46	8.23	7.85	27.09	26.64	432.72	374.5	605.09	576.01	623.53	663.4	26.21	29.97	90.12	100.34	299.66	351.34
2933.35	2886.5	59.79	58.84	3.88	3.59	21.09	19.69	2137.32	2062.76	572.08	537.91	197.09	255.86	100.34	154.37	1	1	3.42	8.31
2256.45	2239.44	121.73	120.8	7.04	7.31	28.12	28.22	645.36	521.2	887.17	863.35	478.02	533.25	307.11	320.97	72.35	75.15	46.18	51.06
5531.37	5487.23	112.7	111.79	7.09	6.84	30.99	31.1	1841.85	1762.81	1926.75	1917.07	1173.31	1186.12	104.19	106.77	192.77	202.45	180.88	191.57
2557.67	2538.85	97.16	96.44	6.19	5.82	27.98	27.4	1011.85	985.2	800.86	791.21	565.92	570.03	316.13	313.16	58.93	69.02	74.61	89.92
5637.04	5601.45	110.45	109.75	7.21	6.72	30.2	28.76	1525.12	1433.95	2140.81	2074.75	1398.14	1511.81	124.21	120.31	136.33	159.03	30.81	31.29
2113.03	2097.64	90.78	90.11	6.1	5.65	29.57	29.38	782.87	756.49	632.93	644.87	409.13	412.62	196.3	191.57	108.06	113.25	79.39	79.23
2510.85	2501.52	139.18	138.64	8.32	8.32	29.28	28.8	613.56	590.34	874.63	840.25	560.61	576.48	158.56	171.98	156.23	182.89	60.13	67.13
3955.43	3938.49	116.71	116.21	7.35	7.09	30.99	29.52	1184.83	1174.41	1615.52	1554.14	793.15	825.46	291.31	363.69	133.72	138.03	68.88	68.29
5972.5	5949.41	121.33	120.86	7.61	7.32	29.65	29.41	1369.63	1294.04	2402.29	2304.64	1673.54	1743.92	73.88	95.71	146.1	135.54	170.63	188.86
1035.35	1031.72	118.76	118.32	7.16	7.11	21.91	21.6	263.24	245.14	393.94	389.05	297.15	298.27	228.11	263.29	7.14	3.55	65.42	68.54
4555.07	4537.82	115.66	115.22	7.13	6.94	35.04	32.33	1498.91	1522.38	1530.16	1456.68	924.03	910.63	2.25	6.47	171.78	159.84	53.77	70.31
2871.28	2853.58	58.37	58.01	3.76	3.51	25.7	26.03	2286.14	2214.19	499.52	529.11	70.94	92.48	131.99	129.83	8.86	3.78	34.86	34.17
3062.63	3053.91	116.54	116.21	6.86	7	32.82	31.54	919.84	838.9	1314.84	1349.31	568.59	575.57	403.43	432.33	69.06	96.84	8.9	10.66
6071.08	6056.75	129.09	128.78	8.17	7.87	28.36	27.04	1262.85	1220.24	2327.25	2281.45	1814.21	1873.1	393.15	406.71	211.52	199.79	70.26	80.35
5237.16	5224.7	108.93	108.67	7.07	6.63	31.09	30.74	1683.63	1644.68	1578.24	1495.46	1170.99	1233.15	71.51	92.88	216.74	241.16	132.91	149.79
1540.22	1537.7	114.68	114.49	6.93	6.92	26.32	24.8	444.61	375.01	652.43	688.75	309.42	324.85	281.95	351.1	44.62	47.01	71.4	32.38
5337.93	5329.81	104.59	104.43	6.7	6.7	32.57	29.88	1819.46	1550.28	1692.66	1727.85	1234.71	1352	4.76	4.86	161.81	150.62	221.14	271.74
2467.54	2460.31	52.45	52.3	3.55	3.18	19.9	20.66	1962.12	1957.74	408.92	388.9	91.73	108.81	220.33	274.38	1	1	36.48	41.23
4881.87	4875.11	99.51	99.37	6.4	6.1	29.22	29.27	1760.03	1697.71	1506.84	1485.76	1216.26	1211.54	8.19	11.19	100.9	109.75	193.46	247.08
3020.88	3014.77	61.59	61.46	4.04	3.73	20.9	21.89	2230.38	2207.03	698.99	675.94	83.32	117.25	29.24	30.01	3	3.35	42.56	43.43
2677.64	2671.61	54.55	54.43	3.73	3.33	21.45	21.31	1988	1964.7	487.81	480.86	168.89	193.93	126.04	146.3	3.7	2.12	126.73	112.71
2920.98	2918.53	101.85	101.76	6.48	6.22	28.03	28.04	983.05	908.9	1213.13	1227.03	454.2	485.35	221.42	257	84.37	87.06	84.62	92.62
5338.26	5336.01	109.13	109.08	7.07	6.72	37.76	31.79	1845.99	1798.68	1635.45	1648.24	1291.46	1265.48	199.67	214.11	169.27	181.44	38.15	46.81
5408.27	5406.79	110.19	110.16	7.18	6.7	25.22	24.8	1441.83	1428.43	2153.2	2132.17	1529.65	1530.14	26.33	38.7	76.27	91.03	52.48	55.09
2557.55	2559.64	50.11	50.15	3.76	3.16	22.89	22.46	1894.3	1877.09	484.7	496.36	147.13	140.4	8.99	8.79	5.09	7.09	160.41	164.6
679.63	680.3	100.15	100.22	6.1	6.02	19.13	18.76	237.23	220.81	295.84	285.59	137.56	165.11	24.49	30.72	1	1	82.38	97.38
2685.9	2692.17	54.72	54.84	3.65	3.36	20.92	21.49	2126.23	2084.09	442.64	475.75	92.53	98.54	308.41	325.02	3	3.07	170.62	152.81
5678.29	5686.67	120.74	120.91	7.44	7.28	27.87	27.18	1536.55	1487.39	2019.83	1996.62	1533.83	1587.1	6.67	7.01	187.08	194.05	62.68	82.5
2571.13	2580.81	53.45	53.65	3.51	3.26	22.64	22.28	2162.78	2146.64	364.99	372.7	31.24	47.19	227.08	230.18	5.46	7.28	176.67	180.17
4575.42	4585.6	93.22	93.42	6.17	5.78	32	31.36	1828.96	1802.34	1367.36	1337.54	943.39	986.38	389.9	400.11	109.57	112.5	10.98	2.44
5510.5	5521.06	117.17	117.39	7.5	7.1	25.8	25.81	1320.96	1305.44	2137.05	2124.85	1542.81	1578.41	8.7	11	95.11	83.09	40.71	35.17
2654.43	2666.46	55.23	55.47	3.76	3.35	21.59	20.99	2023.1	2000.09	476.1	476.03	145.91	179.34	195.82	225.63	1	1	14.79	17.04
2973.61	2979.94	124.15	124.41	7.85	7.51	30.14	28.04	817.25	789.43	940.79	896.67	749.31	770.77	24.62	28.81	173.53	210.22	130.44	129.5
2249.47	2262.59	46.75	47.02	3.71	3.01	23.67	24.01	1626.19	1621.56	432.05	422.33	155.24	170.04	77.81	76.03	11.38	19.59	48.55	52.46
1089.23	1091.72	126.19	126.47	7.73	7.63	25.88	24.08	255.39	241.91	407.87	366.98	303.22	338.15	4.2	7.53	34.44	66.51	135.32	153.43
2405.01	2419.28	50.02	50.32	3.54	3.08	25.49	24.3	1865.37	1861.3	416.55	396.18	108.72	143.58	237.57	268.16	8.71	8.54	187.33	195.77
3170.34	3179.87	117.02	117.36	7.66	7.21	30.57	30.89	876.51	810.87	850.84	833.81	901.14	897.35	167.83	160.77	161.24	191.2	125.7	200.83
5028.86	5048.09	104.54	104.94	6.46	6.32	28.98	28.62	1882.4	1882.34	1977.96	1975.67	840.96	839.59	21.07	20.34	92.54	123.15	85.53	90.4
2455.31	2475.34	51.11	51.53	3.71	3.17	21.66	21.89	1798.36	1782.36	438.9	447.38	194.54	220.48	214.75	204.92	2.43	4.77	8.65	11.06
4686.02	4707	95.47	95.9	6.35	5.9	27.39	28.19	1738.93	1735.56	1449.46	1411.87	1080.22	1135.29	12.71	12.81	144.13	141.31	29.14	31.6
2589.14	2612.95	52.81	53.3	3.66	3.28	20.98	22.07	1995.21	1944.13	510.48	548.12	70.75	102.84	331.58	345.81	5	5.06	53.12	72.12
5292.4	5317.76	107.15	107.66	6.81	6.54	29.68	29.09	1823.21	1743.86	1794.05	1756.55	981.94	1011.19	140.13	161.84	226.34	279.92	23.23	25.74
1969.35	1977.84	124.41	124.94	8.16	7.69	30.07	30.1	448.95	450.95	631	572.09	617	656.52	292.38	268.39	69.04	81.13	62.68	68.23
5568.46	5596.86	112.74	113.31	7.27	6.99	34.48	32.11	1742.75	1655.61	1820.38	1833.68	1153.64	1191.12	26.95	39.83	259.66	296.73	152.48	154.14
2959.48	2988.82	59.92	60.51	4.02	3.67	25.43	25.56	2072.21	2076.87	592.49	559.54	255.23	300.2	18.2	22.73	9.17	4.06	118.95	123.61
2393.5	2423.2	48.81	49.41	3.52	3.05	20.16	20.56	1842.97	1849.31	395.33	391.73	137	159.42	6.55	13.43	1	1	117.17	110.23
2755.98	2785.52	57.37	57.98	3.93	3.54	17.8	17.64	2075.37	2076.07	544.04	542.41	136.57	167.05	181.46	185.5	2	2	8.73	18.63
2383.48	2413.32	49.64	50.26	3.57	3.1	21.34	21.13	1890.17	1893.1	421.15	426.22	64.96	78.93	337.03	350.67	0.66	1.64	32.01	40.18
4559.27	4589.97	92.89	93.51	6.41	5.89	29.39	28.8	1805.55	1810.78	1447.19	1396.72	987.39	1048.76	207.87	224.79	91.49	97.15	106.2	102.8
5264.73	5294.43	111.91	112.54	6.94	6.83	33.41	33.05	1947.79	1882.41	1675.49	1667.1	925.68	975.7	59.57	63.23	197.85	226.99	93.85	107.67
2536.5	2553.53	97.31	97.96	6.89	6.28	31.48	30.74	839.75	840	679.66	633.54	627.2	669.77	210.3	232.74	107.41	95.5	135.11	134.19
2566.52	2584.23	99.47	100.15	6.42	6.06	26.31	26.1	857.79	849.53	1117.53	1122.07	471.97	491.56	186	195.57	28.84	26.54	99.08	127.52
5175.99	5208.48	107.75	108.43	6.98	6.63	28.1	28.37	1489.54	1410.36	2070.44	2035.01	1213.17	1313.3	191.75	209.98	113.14	137.85	139.89	153.69
4003.84	4029.38	109.45	110.14	6.98	6.73	31.13	30.46	1325.64	1284.41	1363.05	1330.4	942.43	1006.17	236.81	273.9	126.59	145.7	57.04	66.86
5133.44	5166.6	109.15	109.85	6.76	6.6	27.15	27.04	1551.02	1485.16	2168.64	2202.02	989.66	1060.17	215.68	205.09	163.5	140.99	218.59	254.37
3742.79	3764.3	122.67	123.38	7.64	7.45	30.14	30.78	1010.23	990.03	1211.74	1174.4	966.64	987.22	172.03	171.52	146.74	149.9	188.33	186.76
4670.57	4703.97	99.28	99.99	6.37	6.08	35.41	29.02	1676.44	1624.45	1615.34	1631.38	1003.57	1049.32	199.26	227.71	94.12	125.19	244.2	285.96
4802.53	4837.17	99.92	100.64	6.24	6.06	29.63	30.38	1872.9	1813.83	1595.95	1575.75	1005.56	1094.17	131.92	129.85	102.31	111.6	112.66	154.48
4106.73	4133.98	112.66	113.41	7.39	6.98	31.41	27.18	1168.22	1161.75	1430.81	1357.02	1188.58	1269.33	19.87	26.27	85	84	96.31	112.81
1820.38	1831.8	122.44	123.2	7.66	7.45	27.84	28.01	473.94	443.12	587.34	576.34	593.37	633.83	297.53	309.1	24.91	38.01	44.62	63
2828.13	2866.23	57.8	58.57	3.7	3.54	21.35	23.15	2194.09	2144.13	520.92	557.97	92.01	129.04	405.69	431.76	1.23	8.82	32.26	33.19
5440.06	5479.05	110.52	111.3	6.99	6.7	29.51	29.2	1465.29	1430.5	2182.6	2191.93	1264.25	1314.75	272	275.28	160.13	152.43	50.81	53.88
5403.47	5443.1	110.18	110.99	6.93	6.77	32.22	30.64	1871.35	1800.72	1653.88	1648.82	1149.32	1199.38	378.55	388.07	190.32	212.63	65.23	68.12
2822.57	2842.44	122.2	123.05	7.73	7.44	31.45	27.54	695.11	676.07	861.28	889.33	845.14	879.54	387.44	427.92	77.64	89.83	86.55	98.46
5374.67	5416.49	111.8	112.66	7.01	6.86	32.86	31.86	1834.13	1721.54	1572.82	1568.34	1173.58	1245.24	380.97	404.03	194.43	221.55	67.55	73.2
5714.36	5757.7	113.92	114.79	7.37	7.06	27.75	27.25	1528.25	1436.3	2008.79	2002.34	1596.35	1685.5	167.81	157.48	157.05	164.42	117.87	141.19
6063.3	6107.18	119.94	120.81	7.5	7.34	33.55	32.15	1885	1772.16	1948.04	1954.77	1387.28	1438.45	291.63	352.35	268.54	290.69	74.62	90.77
2395.94	2415.51	108.16	109.04	7.19	6.83	29.13	28.33	635.39	603.95	690.56	682.3	734.9	784.53	179	183.54	124.72	143.82	97.45	107.81
5662.08	5708.12	115.54	116.47	7.39	7.13	32.79	29.84	1469.55	1430.9	2148.48	2110.62	1487.45	1555.33	0.53	11.26	138.24	146.21	21.51	22.51
1628.33	1641.67	114.58	115.51	7.3	6.99	32.43	30.49	503.01	512.03	413.88	380.9	383.92	394.85	336.82	379.4	63.91	77.72	19.59	25.82
2357.82	2404.53	47.79	48.73	3.54	3.04	18.35	20.02	1750.38	1762.13	464.82	458.15	142.08	172.99	125.33	144.8	1	1	66.35	76.85
5757.09	5804.59	114.78	115.72	7.53	7.2	29.33	28.19	1391.43	1306.12	2287.14	2241.88	1618.11	1717.17	510.37	568.44	85.44	113.21	122.66	121.13
1849.22	1862.95	130.6	131.55	7.83	7.9	31.37	30.56	400.56	371.14	719.59	671.36	494.22	536.08	432.24	479.89	57.04	84.48	213.46	256.69
6410.45	6461.44	126.81	127.82	8.06	7.81	30.48	29.09	1488.8	1408.97	2037.68	1939.73	1981.61	2109.55	177.89	254.53	231.58	270.15	69.14	84.19
5713.25	5764.49	116.39	117.43	7.67	7.24	27.48	27.29	1384.55	1366.56	1980.24	1949.23	1577.73	1614.65	256.87	330.71	256.11	256.79	21.24	18.05
5142.6	5196.81	101.73	102.8	6.52	6.39	31.67	31.18	1783.05	1532.23	1930.82	1952.5	997.14	1170.57	264.34	266.98	83.09	134.16	36.88	34.15
4864.55	4916.03	103.4	104.49	6.6	6.32	31.35	31.43	1663.23	1646.91	1538.76	1511	1227.97	1210.44	128.43	152.87	115.05	134.48	92.64	104.21
4932.77	4989.06	96.65	97.75	6.71	6.08	34.09	30.46	1566.89	1570.94	1688.04	1659.32	1073.05	1137.5	212.02	260.62	163.77	174.14	127.15	140.94
4798.93	4852.61	99.84	100.96	6.29	6.1	28.53	24.48	1939.19	1966.69	1681.11	1597.45	996.32	1070.09	116.38	134.98	42.89	63.06	29.03	45.14
4627.68	4684.47	94.61	95.76	6.44	5.92	28.27	27.36	1782.28	1777.5	1486.3	1460.13	971.03	996.53	212.42	230.14	135.34	154.51	102.1	113.3
2387.26	2419.03	90.17	91.36	6.36	5.79	25.75	27.07	810.01	789.45	858.63	850.9	533.72	560.89	180.62	187.37	53.73	65.76	41.67	37.32
4476.32	4530.96	103.48	104.74	7.13	6.48	29.85	29.34	1222.27	1213.33	1801.62	1843.45	998.31	1006.3	309.9	336.91	111.27	108.25	75.79	102.04
2533.66	2561.26	118.45	119.73	7.32	7.21	30.38	29.38	716.53	702.22	932.52	938.61	582.45	579.39	329.11	361.58	72.99	101.2	193.39	205.34
5519.16	5581.6	112.61	113.89	7.27	6.97	30.3	29.3	1631.55	1620.66	1690.71	1626.8	1521.42	1613.55	236.06	254.47	230.25	230.26	69.67	74.69
5333.31	5395.83	110.93	112.23	7.13	6.85	34.96	33.55	1657.29	1659.1	1705.87	1681.06	1262.14	1300.02	240.32	243.34	191.57	198.29	85.35	97.85
4519.58	4582.81	94.09	95.4	6.1	6.07	35.51	31.68	1855.75	1489.88	1406.81	1489.43	759.95	976.24	228.79	245.94	135.31	171.96	61.16	84.9
5652.05	5715.33	117.5	118.81	7.42	7.21	31.7	31.68	1575.26	1561.97	2095.89	2090.11	1526.65	1589.11	142.08	162.4	128.39	140.4	0.74	3.82
5073.59	5138.27	103.53	104.84	6.8	6.53	26.43	25.99	1396.73	1364.06	2149.6	2173.91	1190.27	1236.13	224.93	258.94	99.55	107.17	86.09	90.55
4571.82	4620.59	116.69	118.05	7.14	7.11	26.1	25.88	1287.9	1225.15	2103.44	2086.03	942.16	1032.18	92.68	95.35	67.1	83.23	280.45	282.58
5382.25	5449.04	109.75	111.11	6.95	6.72	28.97	29.92	1915.28	1937.07	1876.83	1800.97	1144.97	1202.43	172.66	196.93	167.13	177.52	107.67	105.99
1123.48	1135.63	126.45	127.82	7.67	7.69	29.21	29.27	297.41	285.05	355.15	346.55	315.95	338.99	306.61	316.31	39.07	43.94	95.91	92.03
4899.97	4970.55	96.01	97.39	6.18	5.9	30.53	27.29	1656.22	1634.75	1929.84	1899.71	1005.76	1092.27	196.53	209.06	72.8	78.66	60.64	75.7
5061.99	5129.54	103.13	104.51	6.87	6.4	32.45	32.29	1683.56	1677.45	1452.44	1432.44	1288.35	1335.74	223.35	224.02	178.53	213.48	45.57	55.57
2998.73	3041.73	97.27	98.66	6.79	6.21	31.15	31.54	1036.26	1027.08	773.08	746.21	742.39	786.68	29.53	32.19	131.52	149.09	16.42	17.16
5255.82	5322.75	109.35	110.74	6.79	6.72	32.9	32.22	1885.32	1877.31	1849.28	1828.81	1036.34	1109.76	278.16	336.85	144.36	172.62	147.15	171.47
2554.06	2622.66	53.14	54.56	3.64	3.33	23.46	23.62	1937.16	1971.88	434.33	435.61	139.95	167.25	134.58	168.77	13.1	15.73	90.43	114.97
5856.07	5926.87	119.39	120.83	7.44	7.29	26.85	25.38	1610.54	1580.06	1939.35	1867.06	1935.53	2044.22	294.13	344.02	83.76	80.04	193.84	239.34
4878.31	4949.84	99.18	100.62	6.11	6.06	27.77	27.9	1749.04	1656.57	2112.81	2119.39	817.86	924.91	143.71	171.79	32	40.03	125.64	137.87
4627.1	4685.67	114.96	116.41	7.25	7.04	29.62	28.37	1231.27	1237.59	1732.37	1756.68	1104.99	1086.49	261.12	241.48	158.13	158.09	45.1	49.13
4487.65	4557.61	93.35	94.8	6.23	5.8	28.75	28.8	1858.93	1861.3	1504.86	1500.27	779.98	822.35	156.68	174.43	106.32	94.24	101.72	106.71
5289.28	5360.82	107.45	108.9	6.87	6.58	32.27	31.5	1523.7	1513.66	1874.41	1842.85	1365.26	1482.95	184.06	215.65	129.69	145.7	261.34	274.97
3781.58	3833.6	106.36	107.82	6.6	6.49	30.63	29.63	1300.54	1263.17	1259.91	1246.82	805.55	860.2	238.55	245.64	159.82	161.47	43.5	51.55
4922.56	4994.27	102.42	103.91	6.41	6.32	33.81	33.05	1953.1	1945.36	1573.79	1516.26	947.89	1025.48	353.55	399.6	123.83	137.83	102.31	135.27
3539.53	3582.03	125.48	126.98	7.96	7.78	27.62	28.94	923.53	911.4	1249.35	1227.22	909.01	948.45	285.8	314.68	162.05	182.46	238.16	286.17
5807.41	5880.44	121.99	123.52	7.59	7.47	31.91	31.61	1642.44	1603.52	1908.34	1884.22	1420.1	1427.04	239.74	238.2	264.39	311.69	8	10.05
4693.36	4762.01	105.88	107.42	6.84	6.51	30.48	29.7	1654.92	1666.75	1369.22	1296.08	1012.07	1087.73	342.2	339.75	183.02	210.01	95.22	92.94
5151.95	5227.93	105.64	107.19	6.87	6.51	30.23	30.13	1854.46	1810.88	1731.21	1758.65	915.81	974.05	193.31	228.12	166.53	160.19	23.91	25.8
5250.84	5326.21	109.22	110.78	6.94	6.76	29.53	30.64	1680.45	1541.56	1836.65	1843.2	1076.75	1189.93	394.76	434.16	202.14	257.29	61.4	61.05
2407.79	2439.87	119.22	120.79	7.79	7.39	26.78	26.46	643.59	636.41	555.42	526.28	713.45	695.35	295.48	331.83	205.72	240.91	89.47	96.34
5581.13	5658.45	113.88	115.45	7.45	7.07	29.31	29.88	1415.24	1404.47	1910.97	1860.21	1637.48	1728.38	257.02	269.95	178.07	168.23	181.28	208.96
5332.36	5407.19	113.38	114.97	7.1	6.91	27.54	27.07	1499.87	1452.3	1943.61	1955.47	1439.97	1499.83	179.33	210.63	121.16	134.58	69.98	71.2
3999.38	4053.98	118.05	119.65	7.53	7.21	27.52	27.36	948.15	947.46	1635.6	1620.57	1038.59	1085.93	246	279.7	69.22	76.21	57.36	62.45
4328.66	4407.6	88.23	89.84	6.21	5.53	29.28	28.94	1821.32	1815.44	1396.39	1413.11	789.34	815.52	201.29	224.95	77.04	84.77	218.28	257.3
4222.14	4285.97	107.62	109.24	6.98	6.69	30.96	30.96	1549.36	1429.68	1263.14	1340.19	878.79	926.97	13.12	15.8	198.29	210.96	119.46	124.91
5039.37	5120.01	102.68	104.31	6.64	6.36	30.18	30.49	1609.91	1583.77	1865.34	1864.08	1171.56	1258.73	6.95	10.12	123.73	115.27	28.82	32.67
2397.92	2475.76	50.37	52	3.67	3.19	23.22	22.57	1674.75	1717.83	528.31	514.59	171.9	216.45	247.99	294.12	9.83	11.1	131.26	144.32
2110.68	2194.1	41.75	43.4	3.49	2.83	23.58	24.95	1731.16	1735.25	284.83	315.75	74.22	118.03	251.56	279.44	13.52	10.06	28.62	33.07
3883.6	3933.54	129.6	131.26	7.97	7.9	33.92	31.9	896.49	863.67	1422.74	1410.89	1066.01	1076.69	178.61	170.69	132.5	146.98	137.66	146.79
5802.44	5882.34	120.84	122.5	7.62	7.41	27.35	28.66	1380.85	1346.86	2413.83	2379.21	1525.26	1595.73	215.98	241.51	156.32	190.33	56.58	75.21
4523.46	4603.77	94.17	95.84	6.44	5.94	31.05	30.2	1744.05	1723.49	1399.77	1338.27	1004.58	1147.33	29.7	34.3	99	116.18	137.76	176.1
4520.61	4603.24	92.15	93.83	6.23	5.75	29.41	30.06	1780.69	1761.53	1399.15	1404.16	993.42	1039.44	231.72	254.16	109.87	134.09	202.72	222.42
589.86	600.19	100.38	102.11	6.46	6.23	27.04	26.46	189.86	177.25	219.88	222.66	108.37	116.72	220.79	223.53	22.46	23.45	223.57	207.24
4647.48	4730.87	96.75	98.48	6.4	6.02	31.09	31.03	1614.81	1585.05	1483.83	1470.48	1125.75	1200.92	220.79	237.37	125.01	143.4	29.9	56.04
4792.15	4877.42	99.75	101.52	6.26	6.12	30.12	29.99	1843.77	1766.48	1507.77	1578.85	936.56	990.01	222.84	250.26	160.6	197.42	99.26	122.24
5084.75	5172.01	103.65	105.42	6.9	6.47	31.92	30.64	1638.72	1578.19	1735.09	1717.5	1087.05	1194.09	163.78	164.24	189.64	188.17	8.99	17.6
4472.19	4559.63	91.43	93.21	6.13	5.67	31.84	31.64	1707.05	1717.65	1442.01	1424.41	941.94	983.18	216.91	240.66	89.22	99.93	14.55	25.75
2059.82	2089.65	124.71	126.49	7.73	7.61	26.27	25.52	498.23	482.91	755.06	750.7	516.21	556.67	207.5	231.48	105.3	117.08	52.71	70.33
5240.15	5326.16	109.13	110.91	6.94	6.67	28.53	27.29	1437.77	1418.18	2101.07	2093.94	1364.99	1438.27	165.07	168.98	82.53	100.96	133.32	149.43
4702.44	4790.83	95.31	97.09	6.19	5.9	29.92	29.77	1801.2	1766.23	1483.89	1525.27	1000.75	1036.35	231.81	254.84	116.46	127.3	129.21	152.54
3111.95	3161.1	113.7	115.49	7.32	7.04	31.92	31.36	920.38	879.48	954.23	957.57	829.32	882.73	377.64	415.38	115.8	131.41	108.76	131.33
4843.26	4928.98	101.74	103.53	6.75	6.33	28.81	27.43	1698.76	1703.9	1600.55	1522.25	1178.59	1273.77	87.28	114.83	104.51	129.09	131.8	173.44
5977.14	6066.18	121.97	123.77	7.82	7.65	30.81	29.45	1356.54	1295.44	2510.31	2485.41	1424.7	1511.16	305.34	322.46	205.86	245.49	17.8	17.3
1905.24	1939.34	101.07	102.88	6.46	6.21	29.94	29.02	633.71	608.85	694.8	722.44	383.3	389.58	432.02	481.08	64.48	66.32	7.71	6.94
4641.99	4730.81	94.62	96.43	6.39	5.93	29.7	28.91	1714.08	1673.78	1354.64	1357.45	999.63	1052.25	262.94	291.86	192.51	222.82	23.97	30.27
5689.99	5779.63	115.2	117.01	7.6	7.18	31.49	30.89	1608.41	1587.4	1681.43	1694.45	1547.71	1548.83	160.9	179.25	227.04	262.54	57.88	59.04
5228.36	5318.67	106.22	108.04	6.94	6.56	30.86	30.17	1664.75	1663.15	1768.45	1716.3	1389.95	1494.25	174.18	174.85	72.59	78.42	8.46	8.93
3292.23	3346.91	111.27	113.11	7.25	6.86	31.49	30.67	1024.4	1024.34	1048.2	1023.02	881.96	913.32	41.73	52.29	91.42	109.13	16.7	68.21
3218.57	3279.51	97.35	99.19	6.55	6.08	29.42	30.31	1068.49	1057.1	1006.2	1011.35	828.62	855.93	140.58	158.52	79.93	95.38	110.18	118.97
1013.47	1029.92	115.64	117.49	7.02	7.06	24.91	24.8	261.13	244.9	502.82	514.16	187.32	193.08	167.91	179.24	19.73	21.67	104.61	136.02
3386.9	3436.72	125.73	127.58	7.66	7.66	31.07	31.5	870.21	862.79	1178.23	1169.08	1040.78	1076.55	85.67	114.97	71.01	79.22	307.22	301.9
3822	3890.62	103.28	105.13	6.56	6.36	33.46	32.9	1383.2	1371.8	1233.59	1257.11	592.54	618.15	202.49	234.1	164.32	181.75	15.94	20.47
2538.89	2576	116.39	118.25	7.09	7.16	30.2	31.14	802.3	764.68	917.31	937.19	558.76	569.17	237.89	264.25	67.18	84.01	138.78	167.6
5376.51	5471.53	106.36	108.24	6.83	6.66	32.98	31.54	1493.18	1462.7	1951.31	1890.83	1538.72	1681.1	283.2	333.71	94.9	110.77	58.78	55.78
3807.51	3873.27	109.21	111.09	7.01	6.8	29.92	29.52	1272.74	1191.5	1220.01	1275.5	919.59	950.66	186.55	181.76	96.65	115.65	102.22	113.96
5142.38	5234.47	105.44	107.33	6.87	6.53	33.89	30.82	1603.44	1480.68	1623.05	1595.62	1457.28	1625.48	362.01	407.66	129.84	143.41	9.26	9.24
4797.26	4892.35	97.89	99.82	6.46	6.1	27.24	27.43	1466.43	1442.72	1972.17	1987.97	1086.15	1174.97	321.57	335.71	69.53	87.77	83.59	123.23
5479.82	5570.79	116.52	118.45	7.34	7.14	31.04	29.7	1414.36	1371.37	1964.08	1965.22	1424.8	1477.22	343.79	382.86	167.42	177.85	227.02	263.88
5358.96	5454.51	108.61	110.54	6.75	6.71	29.62	28.51	2000.78	1951.55	1719.08	1731.56	1081	1156.82	421.05	466.6	146.1	163.91	32.15	44.9
5465.61	5561.18	111.03	112.97	7.04	6.85	31.48	30.92	1809.49	1735.99	1585.77	1627.75	1256.52	1295.3	88.43	96.71	276.19	279.94	7.8	11.87
6294.06	6394.24	124.51	126.49	7.93	7.78	30.72	30.06	1422.94	1318.9	2340.07	2341.42	1755.99	1856.55	317.99	326.24	228.38	272.9	169.66	198.75
4321.18	4416.48	89.99	91.97	5.84	5.57	32.12	32.29	1776.76	1763.96	1547.66	1526.12	809.07	919.87	207.74	214.87	54.16	60.68	143.72	167.34
5132.63	5232.16	102.33	104.31	6.78	6.38	31.35	30.64	1875.42	1890.23	1531.06	1468.64	1165.82	1249.41	216.33	217.81	140.62	190.92	119.78	145.48
5169.13	5263.17	109.88	111.87	6.97	6.76	33.12	32.18	1493.4	1461.55	2165.28	2170.39	868.03	940.78	366.01	403.29	173.34	200.61	151.85	157.66
2904.84	2951.14	126.38	128.38	7.72	7.74	26.91	27.25	777.38	751.18	875.63	784.17	913.18	1050.02	314.01	312.66	78.81	96.41	105.79	119.37
5486.34	5585.28	111.53	113.54	7.25	6.99	32.85	33.7	1571.9	1504.85	1802.02	1747.03	1482.88	1592.79	50.58	64.09	161.21	202.04	32.26	35.45
5299.36	5400.91	105.65	107.68	6.87	6.73	31.17	30.71	1817.61	1714.87	1653.01	1700.86	1062.8	1171.51	227.52	233.39	213.79	214.85	59.15	59.96
1023.52	1041.71	116.21	118.25	6.89	7.11	26.02	26.86	319.51	280.72	369.08	351.53	255.47	301.77	315.36	344.48	20.89	33.55	25.76	34.34
4712.78	4812.96	96.02	98.06	6.58	6.19	29.86	28.04	1630.73	1638.89	1599.92	1601.03	1015.08	1092.46	237.06	262.15	144.3	154.23	48.57	66.3
4204.57	4271.06	130.5	132.55	8.14	7.99	27.22	26.21	823.94	785.49	1669.02	1660.28	1259.88	1313.57	265.42	302.63	112.45	141.43	121.4	138.64
5300.95	5402.12	108.07	110.13	6.9	6.66	29.42	30.02	1644.82	1618.41	1922.08	1912.51	1345.2	1444.03	354.34	376.46	90.39	103.97	46.3	54.41
4518.96	4596.5	121.51	123.58	7.49	7.44	30.16	29.84	1311.72	1269.13	1576.31	1577.4	1078.33	1143.13	120.22	118.67	197.71	207.88	194.33	224.3
4477.9	4562.26	110.22	112.3	7.32	7.02	31.33	31.25	1397.69	1366.42	1257.61	1200.26	1088.63	1163.87	184.59	196.49	198.34	246.29	122.8	167.16
3433	3497.79	111.19	113.28	7.02	6.84	28.91	29.12	964.79	944.02	1562.65	1570.02	673.94	740.25	168.52	199.45	41.41	53.62	49.59	60.35
4627.78	4728.63	97.21	99.32	6.3	6.08	26.87	26.96	1700.88	1671.32	1528.49	1514.77	1065.29	1160.78	135.59	144.22	91.17	122.82	266.32	318.67
4290.34	4391.78	89.32	91.43	5.95	5.66	33.93	34.31	1884.38	1770.45	1182.84	1224.67	707.32	809.1	55.56	59.35	129.01	130.81	37.15	40.49
4526.01	4629.44	96.21	98.4	6.42	6.02	32.17	31.03	1831.54	1803.75	1521.14	1529.67	800.62	891.63	260.19	301.17	117.67	135.26	88.69	130.98
630.94	642.18	125.69	127.89	8.35	8.05	27.62	27.76	148.59	138.54	180.75	170.52	187.46	205.43	83.15	93.77	29.76	35.67	25.75	21.75
5196.65	5304.66	105.94	108.14	6.8	6.58	31.13	31.25	1969.67	1986.57	1675.98	1649.12	1018.71	1072.6	164.6	156.57	140.84	150.88	23.79	28.48
4478.21	4588.15	91.32	93.55	6.19	5.74	28.36	28.84	1763.38	1762.14	1682.19	1687.27	875.15	964.77	78.46	65.19	45.71	47.12	63.75	59.29
3874.18	3962.21	99.91	102.18	6.55	6.23	32.57	32.54	1360.16	1372.15	1256.91	1281.56	827.5	841.14	392.33	407.14	127.34	163.99	47.68	68.4
1410.94	1442.13	104.54	106.83	6.56	6.46	31.35	31.5	472.3	450.01	468.36	453.08	285.41	326.36	311.65	330.68	49.83	72.27	125.87	147.57
4720.69	4811.6	120.17	122.48	7.5	7.42	30.12	29.48	1347.34	1318.02	1262.09	1209.86	1378.54	1441.88	238.48	239.76	202.63	258.6	137.75	164.62
5053.15	5166.99	103	105.32	6.81	6.44	31.91	30.67	1651.61	1646.31	1678.2	1708.63	1061.55	1105.4	371.11	430.36	147.42	153.55	90.36	103.64
4343.76	4440.86	105.36	107.7	6.72	6.51	35.4	33.66	1653.83	1657.64	1323.56	1326.19	788.6	861.99	230.44	269.91	115.71	148.05	102.51	127.12
6233.54	6353.5	124.47	126.86	7.91	7.67	26.32	26.06	1429.38	1379.22	2300.34	2226.69	1898.57	2020.52	94.42	126.5	204.24	240.67	54.4	69.03
3713.61	3803.04	100.19	102.59	6.27	6.19	30.73	31.57	1472.36	1428.02	1046.68	1091.57	740.1	738.33	177.15	188.72	124.77	152.97	122.89	135.86
2525	2582.93	105.41	107.83	6.7	6.5	25.06	25.7	784.58	749.52	1121.08	1144.95	484.86	512.69	222.65	263.39	31.07	31.66	187.79	208.75
3343.84	3421.06	105.3	107.72	6.81	6.65	25.25	25.63	1062.17	1037.29	1214.77	1223.54	742.86	797.19	310.71	340.33	132.33	148.56	45.13	52.46
4496.08	4614.25	92.19	94.61	6.28	5.79	26.81	28.01	1882.3	1846.29	1349.07	1355.82	920.25	1003.27	385.34	427.23	69.11	75.15	276.72	244.28
5851.43	5975.63	119.4	121.93	7.64	7.43	30.55	30.2	1457.93	1419.44	2201.69	2200.75	1568.79	1659.61	212.8	238.84	178.99	206.07	100.96	121.32
5230.2	5354.3	106.92	109.46	6.88	6.74	30.48	31.21	1728.73	1640.41	1562.63	1581.79	1268.39	1340.65	228.09	249.87	155.91	211.69	137.8	153.85
4929.65	5050.88	103.55	106.09	6.61	6.42	30.92	30.13	1717.57	1727.6	1681.13	1652.79	1094.42	1165.95	41.22	54.16	114.98	134.36	60.23	66.17
5526.4	5655.5	109.32	111.87	7.14	6.87	28.48	30.13	1573.18	1497.32	2067.88	2076.65	1352.66	1465.84	58.55	84.41	172.8	192.37	36.22	42.88
1613.32	1651.97	107.13	109.69	6.77	6.69	28.34	27.86	489.52	480.95	631.03	603.47	398.59	445.06	192.44	236.59	35.17	51.04	16.93	18.76
1275.6	1301.81	126.85	129.43	7.73	7.77	25.32	27.76	320.49	317.04	510.01	503.14	369.67	379.01	212.27	252.69	9.16	11.28	112.49	127.67
4784.06	4911.63	97.26	99.85	6.2	6.04	26.95	27.83	1696.78	1644.17	1925.91	1983.28	887.55	943.06	108.98	126.22	57.41	74.27	47.94	54.5
4936.34	5062.91	101.22	103.81	6.46	6.3	27.72	28.12	1580.43	1491.76	1856.31	1888.38	1103.69	1228.22	219.89	230.19	125.77	142.83	82.54	100.12
1346.53	1376.84	116.29	118.89	7.69	7.25	26.05	26.35	330.25	327.92	419.41	409.39	419.18	440.64	391.22	450.95	60.26	63.74	140.17	160.6
5230.75	5353.39	111.19	113.79	7.02	6.93	28.7	31.75	1562.53	1514.77	2196.79	2198.15	1168.92	1239.99	216.82	205.19	65.92	102.07	206.83	261.95
5873.44	5998.88	122.26	124.87	7.78	7.54	28.88	28.51	1295.31	1249	2529.42	2514.22	1380.48	1477.36	313.65	347.33	166.83	188.37	185.21	189.74
5141.84	5270.96	104.21	106.82	6.6	6.45	32.18	31.21	1680.93	1664.06	1838.07	1809.19	1228.08	1363.25	69.86	86.54	73.33	93.25	67.23	81.28
5399.69	5530	110.18	112.83	7.21	6.99	33.16	32.4	1603.05	1541.79	1667.77	1605.64	1299.91	1458.72	276.29	297.12	208.1	274.61	114.42	120.23
1390.37	1423.25	115.58	118.29	7.26	7.11	27.73	28.08	367.86	359.51	531.78	519.53	386.25	414.71	197.19	219.99	18.69	22.48	16.48	26.06
5218.3	5346.5	110.92	113.64	7.18	6.96	33.66	30.56	1590.75	1546.04	1758.48	1763.2	1283.41	1403.24	315.7	355.64	170.58	169.3	8.54	10.34
4738.71	4870.7	98.24	100.97	6.49	6.15	31.95	29.63	1599.98	1612.47	1694.87	1685.57	1103.37	1194.69	174.18	199.47	84.52	102.19	79.05	102.7
4724.31	4855.98	98.17	100.91	6.49	6.18	30.34	31.5	1699.79	1653.88	1411.93	1446	998.99	1077.57	287.48	318.82	195.68	208.92	9.1	22.61
2103.89	2154.52	114.35	117.09	7.12	7.15	24.35	25.02	604.34	573.49	648.86	641.88	568.88	616.16	296.51	326.11	98.37	114.29	155.56	180.69
4810.04	4943.38	100.08	102.85	6.23	6.21	28.7	28.08	1949.87	1928.73	1459.32	1469.21	852.22	893.26	205.96	208.52	177.56	210.13	178.73	201.17
5173.71	5310.59	104.75	107.52	7.15	6.71	31.51	29.77	1544.03	1474.03	1668.88	1742.28	1213.2	1268.12	73.81	109.34	224.07	236.18	82.37	99.17
5070.9	5204.12	105.66	108.43	6.63	6.53	28.9	28.55	1539.21	1459.83	2081.19	2100.44	1085.08	1247.03	225.37	237.3	127.31	143.4	53.22	62.88
1476.08	1513.42	109.76	112.54	6.81	6.81	27.2	25.7	473.32	461.25	537.48	542.19	345.59	342.89	284.42	316.79	38.08	45.87	122.73	156.22
4515.34	4649.64	94	96.79	6.31	6.06	34.74	33.59	1787.89	1737.89	1253.73	1236.44	916.36	1054.07	350.85	424.82	162.32	185.2	61.13	74.8
5197.15	5331.58	108.29	111.09	6.72	6.7	34.68	31.03	1717.53	1564.95	1740.18	1769.03	1123.11	1305.63	350.65	397.58	188.18	207.84	52.49	60.44
5986.3	6124.54	121.7	124.5	7.57	7.5	30.38	28.73	1602.64	1520.04	2371.51	2403.08	1290.48	1355.39	195.52	223.02	251.04	275.73	173.89	179.08
5236.82	5379.75	102.61	105.41	7.08	6.57	31.31	31.79	1594.66	1599.9	1569.86	1592.65	1392.5	1454.79	160.27	172.61	177.31	177.17	130.86	168.31
2464.46	2515.02	137.42	140.22	8.49	8.45	30.61	30.78	488.54	487.02	876.4	866.85	696.25	701.37	183.78	213.31	101.96	117.39	149.35	149.72
1716	1753.91	127.42	130.23	8.14	7.87	27.94	27.97	338.51	337.85	640.05	615.31	485.83	509.22	89.38	121.52	59.08	83.47	64.74	85.84
4663.18	4799.21	96.9	99.73	6.42	6.1	30.55	30.2	1520.45	1454.56	1677.34	1737.49	1156.55	1265.56	159.21	187.01	65.91	68.33	54.29	67.5
1932.2	1982.37	109.8	112.64	6.8	6.79	27.63	28.69	636.26	611.46	600.05	608.98	498.4	527.93	415.41	429.83	82.36	78.14	69.1	78.99
3747.25	3850.65	103.2	106.04	6.47	6.46	30.06	29.84	1191.83	1096.95	1586.7	1646.95	661.6	741.57	270.22	292.65	99.35	111.87	18.27	22.91
5546.83	5682.94	115.57	118.41	7.28	7.21	30.38	29.3	1752.79	1603.78	1705.3	1698.61	1374.01	1561.33	268.72	325.93	177.92	250.75	20.84	31.92
3407.86	3491.49	116.48	119.33	7.31	7.2	28.56	28.19	919.46	876.59	1193.81	1202.5	881.83	942.08	464.99	581.74	96.24	123.27	136.33	156.28
4929.26	5069.43	101.08	103.94	6.54	6.38	31.41	31.1	1725.33	1635.33	1587.96	1623.92	1012.99	1116.13	274.85	316.16	139.93	143.83	169.64	170.87
5387.57	5527.43	110.47	113.34	7.07	6.97	34.16	32.98	1734.35	1603.83	1575.68	1625.5	1201.09	1222.49	406.43	469.09	288.67	326.7	112.81	143.52
5598.78	5736.15	117.61	120.49	7.45	7.31	27.43	27.68	1418.41	1357.23	2411.97	2421.3	1296.97	1396.23	299.64	327.8	146.98	184.9	106.08	114.89
5846.21	5987.88	119.19	122.07	7.38	7.4	32.55	31.54	1810.42	1733.38	1856.98	1901.33	1236.17	1290.91	262.91	301.17	269.89	274.5	126.74	108.43
5525.3	5667.64	111.87	114.75	6.94	6.92	26.24	26.28	1640.2	1579.46	2172.93	2183.61	1284.97	1422.89	245.69	266.76	90.42	113.37	29.48	33.32
5473.23	5615.58	111.27	114.16	7.23	6.95	29.81	28.98	1445.06	1397.97	2167.08	2144	1352.71	1482.05	113.96	133.63	156.78	159.41	96.53	104.03
5543.1	5691.09	109.65	112.58	7.17	6.95	27.01	26.28	1554.61	1513.04	2165.06	2119.76	1469.99	1673.88	229.28	226.91	81.99	95.9	45.2	61.82
2018.76	2068.37	119.71	122.64	7.95	7.41	26.58	26.35	475.27	473.66	573.71	543.9	780.42	837.69	173.6	197.72	51.59	51.01	41.97	59.24
4976.38	5117.71	103.51	106.45	6.51	6.42	29.4	29.12	1667.17	1635.97	1887.47	1949.78	1035.52	1122.58	318.24	350.49	93.19	123.18	9.41	17.22
4741.69	4883.05	98.63	101.57	6.39	6.21	28.6	28.8	1683.34	1653.15	1688.04	1700.5	1028.8	1126.16	234.49	306.75	120.23	137.12	183.55	203.78
5218.66	5361.1	109.62	112.61	7.03	6.85	30.16	29.3	1624.87	1579.11	1727.31	1784.86	1237.23	1294.09	199.9	207.87	185.14	204.97	28.25	35.16
5345.18	5496.03	106.57	109.57	6.83	6.68	29.2	30.24	1652.19	1596.62	1877.27	1898.48	1307.76	1366.82	253.33	281.3	135.72	162.74	20.26	19.94
4864.61	5009.8	101.13	104.14	6.58	6.4	28.25	28.19	1721.14	1743.78	1953.55	1978.06	806.64	843.9	257.79	324.16	93.02	132.55	15.42	37.41
5174.79	5324.02	105.2	108.23	6.93	6.65	29.22	28.87	1516.79	1443.78	2146.43	2126.38	1058.27	1198.67	262.41	300.21	97.46	146.77	136.44	189.57
4863.99	5013.61	99.4	102.46	6.45	6.22	30.73	29.92	1670.26	1648.08	1517.75	1520.25	1257.27	1326.07	269.57	310.22	106.52	126.03	17.88	22.51
3597.37	3688.41	121.68	124.75	7.73	7.56	29.48	28.98	1038.26	1070.57	1096.77	1067.11	914.4	939.1	258.69	314.01	162.64	175.55	79.56	103.69
5020.94	5156.82	114.04	117.12	7.12	7.14	31.99	30.92	1506.1	1422.58	1712.77	1749.12	1178.83	1294.46	278.86	304.69	165.88	171.68	54.12	52.93
5156.55	5307.73	105.22	108.3	6.81	6.63	30	30.1	1467.31	1442.05	1975.66	1952.38	1368.83	1487.36	200.65	201.89	40.93	59.48	118.81	151.17
5109.88	5262.69	103.81	106.91	6.92	6.55	31.22	31.28	1648.04	1634.67	1586.94	1613.54	1117.24	1245.45	294.17	314.22	202.08	220.06	40.16	42.82
4480.03	4609.81	107.73	110.84	6.86	6.7	28.84	29.09	1376.66	1330.61	1581.9	1613.76	1101.63	1209.21	157.19	201.53	118.24	133.01	128.48	160.74
5243.46	5393.41	109.2	112.31	7	6.78	31.3	30.2	1617.01	1592.68	1906.06	1951.77	1124.71	1185.5	101.66	133.44	163.71	195.39	98.57	113.1
5085.7	5235.88	105.43	108.54	6.76	6.58	30.06	30.64	1832.54	1800.95	1784.5	1745.98	1192.21	1349.39	322.46	375.89	59.03	71.86	84.14	92.98
1751.65	1801.89	110.21	113.35	7.09	6.91	26.7	26.96	476.52	478.77	680.07	671.24	398.55	415.39	464.69	479.5	58.64	60.16	58.72	64.86
5877.76	6032.95	119.13	122.27	7.61	7.41	27.33	28.19	1367.68	1291.31	2505.88	2506.52	1558.96	1680.18	221.39	247.06	105.84	160.3	76.63	99.26
6017.16	6175.39	120.15	123.31	7.79	7.46	30.77	30.28	1504.96	1490.13	1806.36	1790.2	1834.76	1950.61	309.39	338.46	293.9	337.29	89.6	113.3
5618.69	5771.06	116.8	119.97	7.16	7.21	31.72	29.38	1586.9	1584.42	2232.98	2225.11	1470.69	1586.18	299.98	316.64	58.8	73.81	64.11	67.76
4498.92	4651.84	93.49	96.66	6.62	6.13	32.55	33.05	1595.77	1595.95	1182.04	1124.18	1203.49	1328.47	265.3	296.8	125.69	164.65	162.24	243.15
5145.82	5302.07	105	108.18	7.08	6.67	31.9	32.15	1516.34	1515.52	1856.4	1875.45	1189.2	1284.63	284.09	301.43	143.74	149.23	71.53	78.65
4031.93	4138.92	120.84	124.04	7.59	7.48	29.84	30.64	1106.04	1067	1363.01	1348.38	866.18	917.37	269.78	311.42	224.57	247.42	94.45	109.5
5141.89	5296.9	106.6	109.81	6.73	6.64	34.16	33.95	1803.91	1783.13	1668.17	1708.6	1023.39	1091.75	212.04	273.59	177.13	222.25	113.89	102.54
4685.12	4842.87	95.78	99	6.46	6.07	27.3	27.11	1740.36	1734.14	1542.78	1579.26	969.25	1026.84	193.26	235.93	95.71	109.92	136.65	159.75
4789.15	4945.4	99.68	102.93	6.51	6.25	30.21	31.68	1779.04	1690.55	1467.16	1520.9	1089.45	1193.01	21.86	51.23	127.04	147.12	106.4	121.56
4848.79	5009.47	98.91	102.18	6.23	6.17	26.15	27.58	1626.28	1555.73	1920.72	1969.8	1006.4	1117.3	215.83	285.52	85.66	104.65	83.2	108.36
1094.61	1124.13	122.7	126	7.05	7.57	26.67	27.18	329.53	278.7	449.05	425.96	272.05	342.7	70.87	86.96	13.57	15.2	93.31	88.23
3582.89	3690.39	110.33	113.63	7.14	6.95	31.65	30.6	1158.51	1110.87	1176.86	1155.48	806.59	879.38	197.97	243.15	146.05	156.44	207.34	233.14
1810.63	1875.25	93	96.32	6.07	5.91	27.84	26.75	689.01	689.43	645.12	662.41	357.66	375.31	272.13	310.94	38.88	38.53	88.03	108.07
5227.16	5391.36	105.83	109.15	6.72	6.63	35.05	32.65	1654.83	1570.67	1829.64	1867.94	1254.56	1383.15	266.13	299.51	134.6	145.77	176.14	215.76
5156.1	5318.49	106.89	110.26	6.89	6.66	31.72	32.36	1671	1681.91	1765.78	1791.87	1121.19	1173.69	135.5	179.11	147.27	158.91	70.33	73.67
5499.22	5665.27	112.11	115.5	7.23	7.01	30.68	31.07	1585.53	1584.77	1762.17	1730.01	1693.35	1815.98	169.39	167.14	109.67	135.82	138.52	162.35
5113.66	5276.86	106.44	109.84	6.79	6.6	28	27.97	1495	1481.19	2197.45	2276.93	1153.46	1181.76	126.94	144.02	79.03	94.99	29.12	49.86
4690.4	4856.77	95.89	99.29	6.52	6.2	32.8	31.03	1605.35	1579.94	1652.54	1701.58	1018	1121.87	249.04	274.89	122.4	130.03	187.87	220.65
3936.83	4101.47	81.81	85.23	5.79	5.25	30.18	30.24	1780.99	1797.3	1237.86	1285.02	646.77	725.58	162.31	160.61	83.14	74.75	41.34	55.57
5026.27	5163.83	126.45	129.91	7.94	7.84	30.14	29.63	1155.26	1103.6	2011.24	1994.73	1399.28	1547.88	356.9	340.4	158.95	182.28	188.49	261.54
5164.24	5340.4	103.12	106.63	6.56	6.47	32.77	32.33	1844.2	1749.02	1955.73	2057.31	909.78	1060	231.83	246.36	118.32	134.37	121.5	182
5227.47	5397.4	109.81	113.37	7.13	7	29.56	29.88	1565.02	1498.1	1761.5	1747.37	1184.33	1333.45	205.56	239.87	228.86	309.77	208.19	268.23
5205.69	5377.64	107.92	111.48	7.04	6.78	33.32	32.58	1474.09	1476.68	1774.55	1761.64	1478.6	1627.76	225.78	274.94	97.26	115.49	74.34	135.05
5019.19	5193.88	102.35	105.91	6.42	6.4	28.49	28.62	1848.02	1781.35	1717.02	1778.84	1085.16	1174.14	339.91	406.38	98.69	133.84	43.69	61.64
5003.91	5186.49	98.99	102.6	6.5	6.34	28.7	30.6	1611.64	1550.37	1871.82	1911.87	1168.07	1285.22	57.89	85.54	72.31	96.59	178.36	242.37
5636.44	5811.15	116.85	120.47	7.58	7.32	28.13	27.61	1400.11	1361.61	2172.24	2193.34	1507.75	1600.58	154.73	169.59	147.34	170.24	102.37	113.63
1378.55	1426.74	104.67	108.32	6.58	6.59	25.75	26.53	448.39	408.5	456.31	478.88	351.02	374.29	215.14	243.4	46.65	56.62	115.79	137.91
4536.66	4715.91	92.42	96.07	6.16	5.87	27.96	28.4	1637.69	1625.71	1817.58	1841.95	837.42	966.25	199.04	226.27	68.39	80.48	17.72	22.89
5259.68	5436.41	109.43	113.1	6.81	6.87	30.56	29.05	1761.15	1723.89	1815.4	1815.85	1178.37	1304.62	230.01	255.35	153.29	192.36	31.02	40.76
4503.19	4679.97	93.58	97.25	6.3	5.99	32.17	31.32	1685.75	1694.77	1466.26	1538.42	828.89	897.18	273.95	316.72	153.61	152.46	80.45	106.23
5156.14	5336.75	104.82	108.49	6.8	6.69	31	31.07	1625.22	1573.48	2088.36	2097.03	998.65	1114.91	282.93	316.65	101.09	152.47	39.27	48.45
5126.81	5301.78	108.98	112.69	6.74	6.95	33.09	32.08	1788.46	1506.63	1639.25	1804.07	1150.96	1323.9	38.39	49.44	168.11	235.57	8.44	22.83
5122.65	5305.58	103.82	107.53	6.58	6.49	30.88	31.1	1814.11	1796.37	1746.24	1779.23	1028.82	1146.5	340.81	401.37	123.82	158.41	3.55	5.46
2597.66	2705.45	89.94	93.67	6.05	5.72	28.38	28.08	1088.53	1119.92	897.91	867.25	529.51	618.06	246.27	300.45	13.84	17.46	123.23	158.6
5852.78	6035.78	119.39	123.12	7.72	7.5	28.38	27.25	1351.74	1270.09	2453.87	2437.3	1425.08	1599.23	297.23	344.21	184.74	223.77	52.08	65.84
2450.08	2530.11	114.62	118.36	7.39	7.23	28.81	26.42	754	690.2	613.01	628.56	685.89	697.19	131.63	163.17	105.7	151.88	148.47	131.21
5385.25	5565.34	112.09	115.83	7.13	7.04	26.35	28.76	1453.6	1393.09	2183.97	2136.63	1247.48	1418.81	220.16	234.44	160.99	213.35	76.12	105.59
4404.15	4588.37	90.01	93.77	6.02	5.74	27.57	28.04	1643.67	1608.02	1681.99	1703.99	884.7	1028.93	167.01	169.95	52.75	67.03	27.52	36.37
4231.64	4375.6	110.67	114.43	6.91	7.05	35.36	34.06	1437.41	1365.71	1361.66	1418.42	861.98	962.14	184.15	210.45	166.88	191.12	139	175.59
5083.73	5265.13	105.68	109.45	6.66	6.59	28.29	28.94	1692.02	1690.18	2052.78	2035.97	1065.02	1236.74	194.64	252.47	78.65	97.13	19.1	35.93
4873.11	5055.46	101.27	105.05	6.69	6.45	26.05	25.42	1546.89	1548.16	1638.82	1617.24	1405.47	1561.34	290.27	305.88	77.52	98.32	56.41	63.21
5377.18	5562.5	109.89	113.67	7.4	6.98	27.3	27	1237.39	1240.51	2310.43	2204.98	1535.51	1722.19	161.65	181.14	83.8	104.93	54.16	99.51
5209.37	5392.57	108.55	112.36	6.71	6.86	34.14	29.41	1776.98	1463.24	1892.14	1997.63	947.42	1182.44	300.85	319.01	166.11	253.82	177.19	220.01
2179.06	2250.25	119.55	123.45	7.39	7.44	26.99	27.76	578.88	516.25	863.94	894.44	515.38	589.24	201.52	256.12	41.33	46.67	171.07	276.72
5157.26	5345.57	107.46	111.38	6.95	6.77	30.5	30.13	1747.48	1679.1	1654.88	1675.61	1241.28	1389.32	318.39	363.41	133.2	178.84	47.52	54.07
3457.65	3571.15	119.77	123.7	7.57	7.47	29.22	28.84	803.75	769.49	1447.85	1391.33	886.67	1020.79	145.65	190.07	63.73	80.48	138.52	162.35
5183.35	5378.65	105.6	109.57	6.96	6.73	32.43	31.43	1582.93	1534.54	1799.12	1872.33	1167.63	1244.13	310.88	329.59	196.47	213.09	29.12	49.86
4781.35	4974.23	99.36	103.36	6.65	6.39	28.39	28.48	1573.43	1593.55	1875.64	1850.12	1090.19	1235.06	208.69	209.11	56.27	62.61	187.87	220.65
5270.53	5466.58	107.47	111.47	6.96	6.75	30.27	31.39	1670.84	1681.68	1861.79	1878.49	1045.72	1136.75	169.89	203.91	252.81	279.33	41.34	55.57
4993.06	5189.89	101.72	105.73	6.67	6.38	30.5	30.82	1549.04	1534.19	1837.93	1887.27	1171.61	1295.73	274.07	292.56	127.22	150.5	188.49	261.54
5246.35	5444.74	106.22	110.23	6.85	6.7	29.88	28.73	1618.05	1656.57	2129.85	2110.44	1141.23	1262.28	144.78	155.28	103.2	118.55	121.5	182
5308.58	5503.41	110.5	114.55	7.1	6.92	30.24	29.02	1466.3	1451.11	1951.02	2023.79	1469.57	1553.94	205.13	243.99	88.89	117.16	208.19	268.23
1981.79	2047.07	125.83	129.97	7.74	7.87	29.31	29.52	510.37	473.04	716.33	740.82	427.67	480.62	314.85	338.98	106.03	98.05	74.34	135.05
5054.2	5253.64	105.25	109.4	6.64	6.63	31.36	30.49	1689.86	1634.91	1871.85	1913.54	1099.01	1226.44	325.14	312.19	98.74	121.45	43.69	61.64
5609.52	5814.38	114.28	118.45	7.28	7.18	33.5	30.2	1510.77	1477.68	2112.11	2127.89	1501.46	1665.63	186.12	213.12	106.22	136.46	178.36	242.37
5291.63	5493.55	110.14	114.34	6.9	6.92	32.12	31.43	1906.42	1729.99	1630	1711.81	1073.03	1304.22	486.3	517.92	194.81	192.2	102.37	113.63
5038.15	5246.63	102.11	106.33	6.63	6.45	30.28	30.64	1856.95	1778.84	1737.3	1790.59	1112.72	1287.52	288.39	408.03	73.52	97.9	28.25	35.16
5840.62	6044.23	121.58	125.81	7.79	7.67	29.2	28.98	1478.47	1477.5	1920.08	1908.16	1659.31	1805.28	280.96	346.96	202	225.86	20.26	19.94
5175.62	5379.87	107.73	111.97	6.97	6.76	30.54	30.02	1609.73	1544.31	1557.8	1564.46	1480.81	1562.28	209.69	238.18	125	198.23	15.42	37.41
5025.55	5237.13	102.54	106.86	6.78	6.56	30.19	29.23	1495.56	1449.71	1827.8	1893.82	1122.06	1208.31	272.82	281.43	162.52	178.58	136.44	189.57
5001.1	5218.78	99.86	104.2	6.28	6.3	31.23	30.85	1729.87	1652.71	1948.78	2024.23	923.08	1093.71	309.86	365.71	83.29	88.37	17.88	22.51
5446.07	5659.39	111.03	115.38	7.23	7.03	32.51	31.36	1529.83	1537.67	2026.68	2025.5	1395.86	1544.22	293.82	346.9	137.69	162.23	79.56	103.69
4864.65	5078.27	99.1	103.45	6.83	6.47	29.06	28.22	1828.98	1826.45	1398.19	1482.71	1094.62	1156.33	229.05	244.51	139.69	158.83	54.12	52.93
4667.77	4893.03	95.22	99.81	6.12	6.03	33.22	33.66	1870.27	1905.01	1335.15	1384.75	822.81	856.38	236.04	274.62	138.37	166.84	118.81	151.17
4519.37	4742.33	93.91	98.54	6.5	6.04	34.86	31.82	1569.76	1600.22	1537.56	1535.61	978.14	1105.24	71.51	59.64	116.83	148.68	40.16	42.82
4466.59	4694.53	91.28	95.93	6.09	5.87	31.59	31.14	1700	1691.86	1488.08	1543.6	724.7	799.55	215.54	252.61	141.63	169.14	128.48	160.74
1852.49	1937.47	101.63	106.29	6.55	6.57	32.18	30.74	594.85	484.52	735.68	785.17	342.05	476.28	243.95	259.19	38.07	58.19	98.57	113.1
4958.82	5188.18	101.12	105.79	6.46	6.5	30.73	30.38	1759.95	1664.85	1777.21	1867.29	932.23	1050.56	252.88	271.93	135.37	190.52	84.14	92.98
4499.16	4728.58	93.65	98.42	6.11	5.93	25.57	29.63	1557.17	1518.88	1657.15	1742.81	928.29	1032.27	152.79	157.23	83.48	125.56	58.72	64.86
4848.32	5085.09	98.93	103.75	6.58	6.32	30.4	30.6	1826.88	1887.96	1313.98	1281.61	1076.29	1197.36	324.19	353.14	190.43	225.58	139	175.59
2658.16	2758.61	127.78	132.61	7.9	7.96	26.76	27.18	558.47	560.09	1008.64	997.02	784.54	832.31	185.88	199.36	112.37	156.39	19.1	35.93
4882.78	5120.65	99.79	104.64	6.68	6.39	31.49	31.5	1637.24	1527.15	1518.31	1593.35	943.3	1115.85	267	320.71	271.24	269.62	56.41	63.21
3544.8	3697.24	112.8	117.65	7.32	7.17	30.64	28.98	996.55	921.8	1333.98	1347.36	787.09	921.52	216.06	218.03	119.79	125.2	54.16	99.51
5200.84	5439.37	106.09	110.95	6.82	6.75	31.14	30.82	1658.73	1613.12	1793.46	1823.68	1074.2	1212.49	227.27	240.63	199.25	201.14	177.19	220.01
2575.25	2683.11	117.05	121.94	7.17	7.47	29.45	30.78	864.61	732.84	717.09	791.2	545.72	613.02	309.15	346	157.44	192.97	171.07	276.72
4701.31	4942.79	96.08	101.01	6.4	6.17	34.77	29.63	1893.26	1890.2	1415.18	1433.87	1018.05	1172.12	213.57	251.82	103.87	144.32	47.52	54.07
5029.31	5273.33	102.17	107.12	6.78	6.59	30.23	32.72	1624.04	1486.17	1671.13	1738.16	1061.11	1250.75	264.11	275.73	185.52	209.88	138.52	162.35
5263.34	5505.11	109.42	114.44	6.89	6.95	31.67	29.95	1654.71	1653.94	2102.03	2158.72	1077.75	1204.42	35.63	46.24	112.91	122.58	29.12	49.86
4959.05	5204.97	101.34	106.37	6.44	6.47	31.38	30.28	1714.68	1616.88	1757.27	1865	936.54	1117.1	145.41	171.23	170.66	192.35	187.87	220.65
373.08	388.29	122.13	127.17	7.54	7.65	29.01	29.52	97.12	94.29	117.39	117.23	87.5	84.7	279.22	324.68	17.72	22.92	43.69	61.64
3030.14	3182.12	106.06	111.38	6.86	6.82	28.86	28.12	941.93	890.83	1080.79	1141.08	784.04	876.5	128.11	145.33	46.95	61.72	178.36	242.37
5106	5374.72	104.02	109.49	6.86	6.67	32.12	27.61	1548.05	1558.14	1918.58	1963.83	1126.1	1230.65	95.59	113.63	153.61	191.2	102.37	113.63
1486.11	1554.22	122.25	127.85	7.53	7.73	31.02	30.02	416.76	398.8	491.34	463.68	379.71	441.15	68.28	65.95	30.91	56.79	28.25	35.16
1411.44	1485.14	110.91	116.68	6.75	7.1	25.25	25.96	453.62	416.04	564.55	575.91	243.12	300.95	199.23	266.06	46.11	55.78	20.26	19.94
1007.87	1057.97	118.77	124.63	7.26	7.5	25.07	24.95	295.21	270.34	299.5	284.15	309.5	379.07	161.42	196.47	31.83	52.99	15.42	37.41
5257	5549.14	107.17	113.13	6.82	6.85	32.99	31.9	1712.1	1622.54	1869.07	1984.3	1206.03	1352.04	133.57	156.84	147.33	165.6	136.44	189.57
4921.72	5209.44	102.4	108.38	6.43	6.52	29.79	29.56	1758.81	1735.91	1720.69	1728.51	1141.8	1392.76	224.5	249.71	86.91	89.94	17.88	22.51
2314.02	2438.74	112.89	118.96	7	7.19	30.96	30.46	728.39	693.92	732.62	772.29	432.02	535.38	51.05	57.28	138.96	149.1	79.56	103.69
4083	4305.44	113.76	119.95	7.14	7.3	27.73	28.87	1209.8	1059.42	1478.31	1545.4	944.54	1153.99	282.77	315.21	149.72	191.33	54.12	52.93
1401.88	1484.58	105.75	111.98	6.83	6.77	28.24	30.24	432.92	431.46	574.15	582.95	289.02	340.32	98.34	127.47	27.22	36.21	118.81	151.17
5187.29	5492.96	105.81	112.04	6.85	6.78	30.92	30.28	1665.02	1603.75	1716.06	1726.76	1167.79	1389.87	182.31	246.47	216.65	281.79	77.17	86.89
1916.29	2017.56	120.63	126.99	7.46	7.64	26.7	26.24	485.57	437.44	777.47	798.08	488.02	564.67	284.85	438.58	47.79	53.96	24.48	23.4
5030.72	5361	102.62	109.35	6.74	6.61	26.72	29.34	1487.8	1437.48	1965.59	1956.94	1263.68	1545.74	304.54	337.01	74.93	111.17	90.66	120.9
4316.39	4587.11	109.66	116.54	7.12	7.15	31.89	30.96	1331.34	1172.69	1365.8	1261.63	1156.6	1449.81	273.64	275.37	123.64	164.88	73.29	85.1
5336.11	5731.64	111.07	119.3	7.21	7.24	33.17	30.38	1575.15	1450.86	1743.47	1924.7	1342.1	1548.65	115.22	147.78	193.66	250.41	59.21	76.58
5071.72	5481.63	105.14	113.64	6.65	6.96	29.01	29.38	1824.86	1673.36	1715.65	1923.79	883.14	1116.63	95.59	113.63	203.37	215.76	167.45	194.29
2891.08	3136.79	115.33	125.12	7.45	7.6	28.46	29.59	688.87	634.68	1247.35	1212.24	725.79	1011.85	68.28	65.95	66.32	76.17	47.86	59.86
